# Supplementary material for: Further Study on Chemical Constituents of Parnassia wightiana Wall: Four New Dihydro-β-agarofuran Sesquiterpene Polyesters
Source: MDPI journal article supplement (doi:10.3390/ijms16059119), 2015-04-23
Supplement: s1 [file s1]

## Supplementary Information

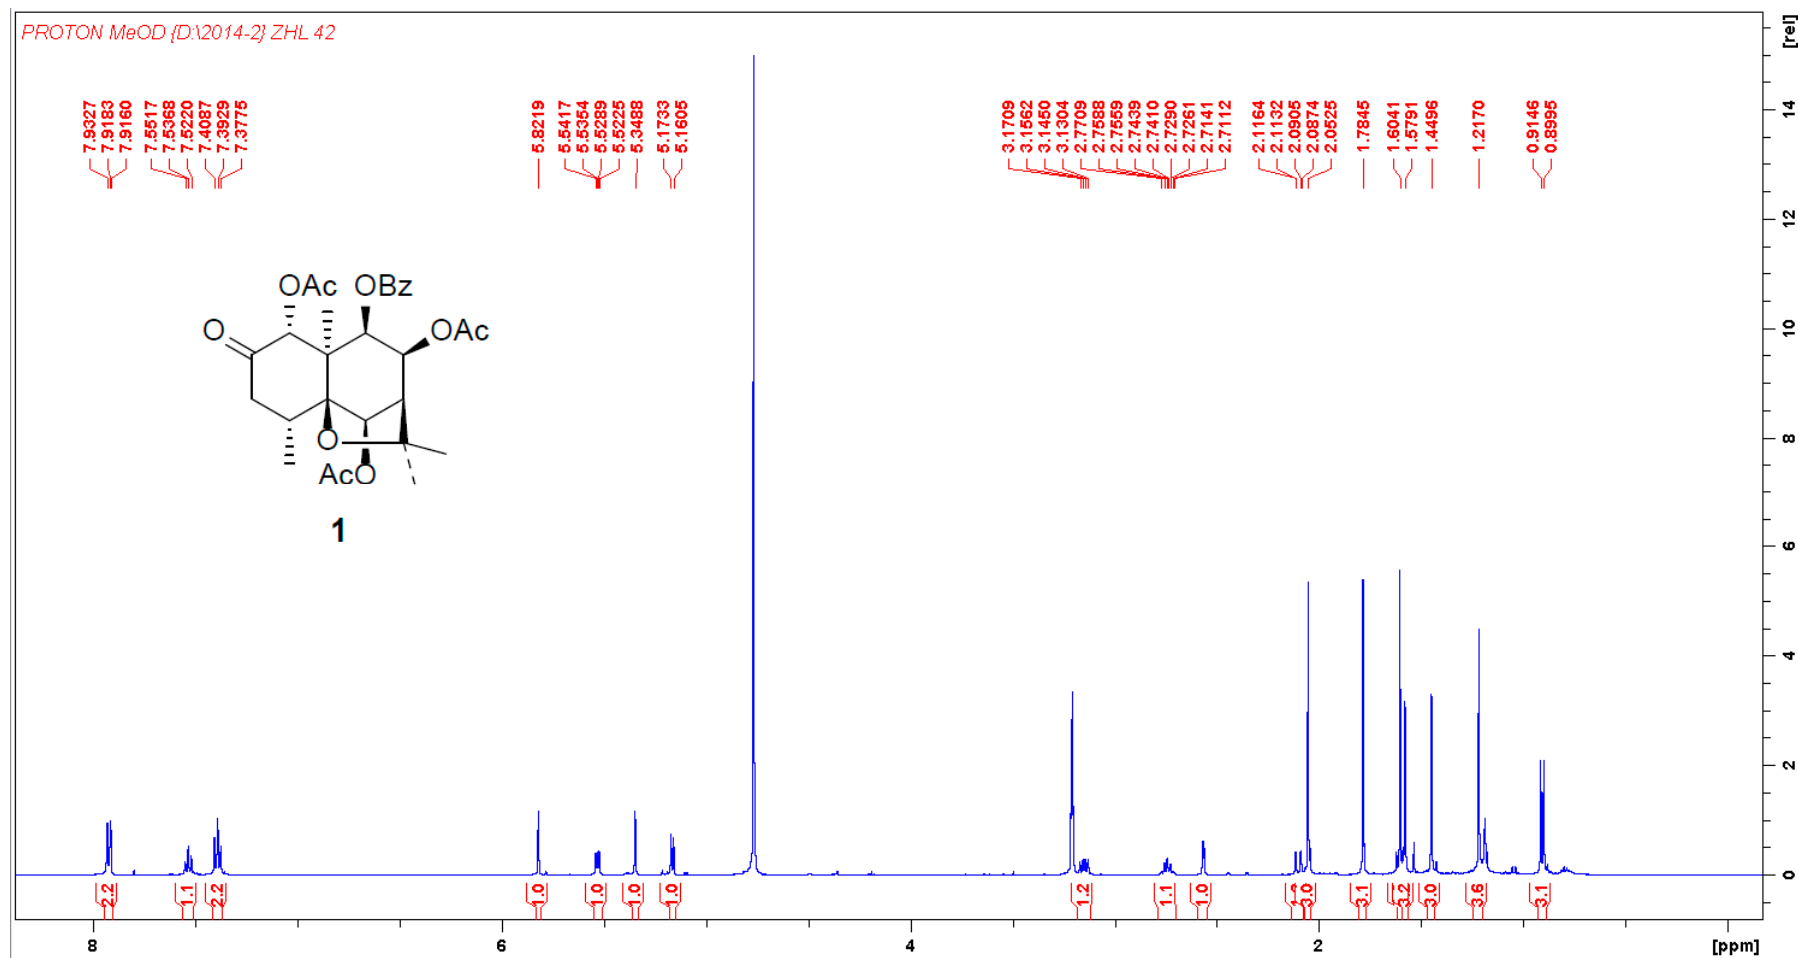

Figure S1. <sup>1</sup>H-NMR (CD<sub>3</sub>OD, 500 MHz) spectrum of **1**.

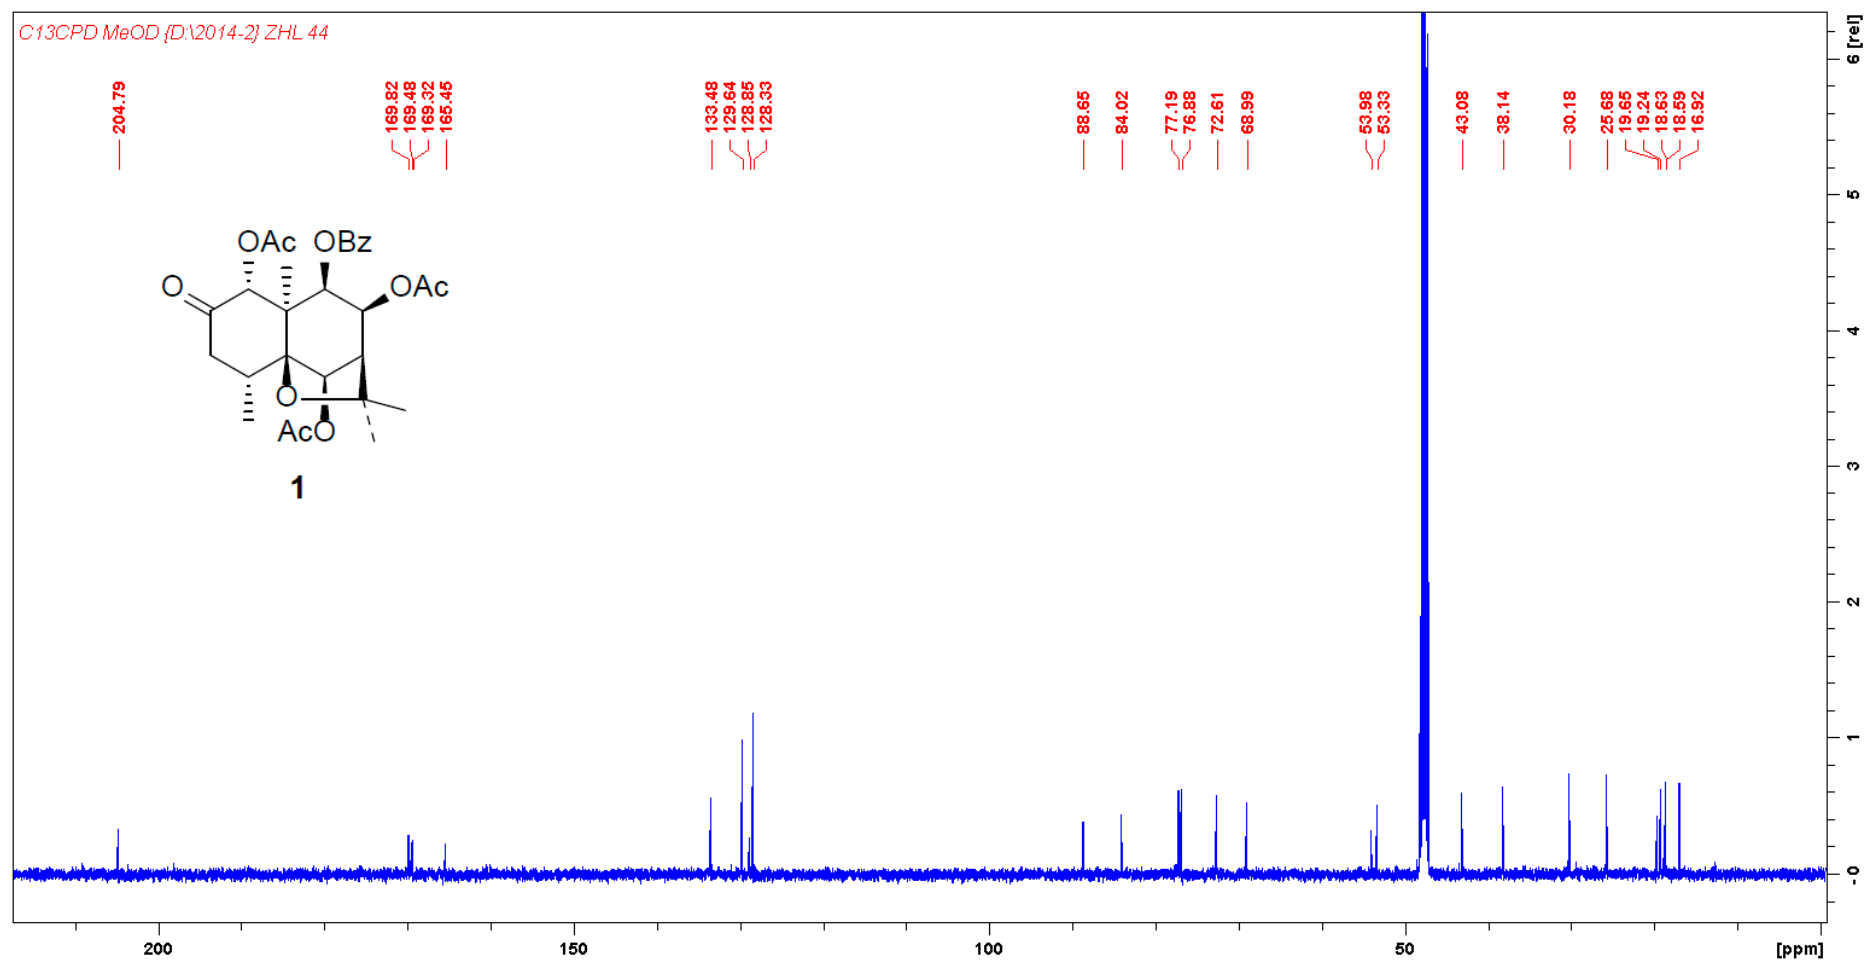

**Figure S2.**  $^{13}\text{C}$ -NMR (CD<sub>3</sub>OD, 125 MHz) spectrum of **1**.

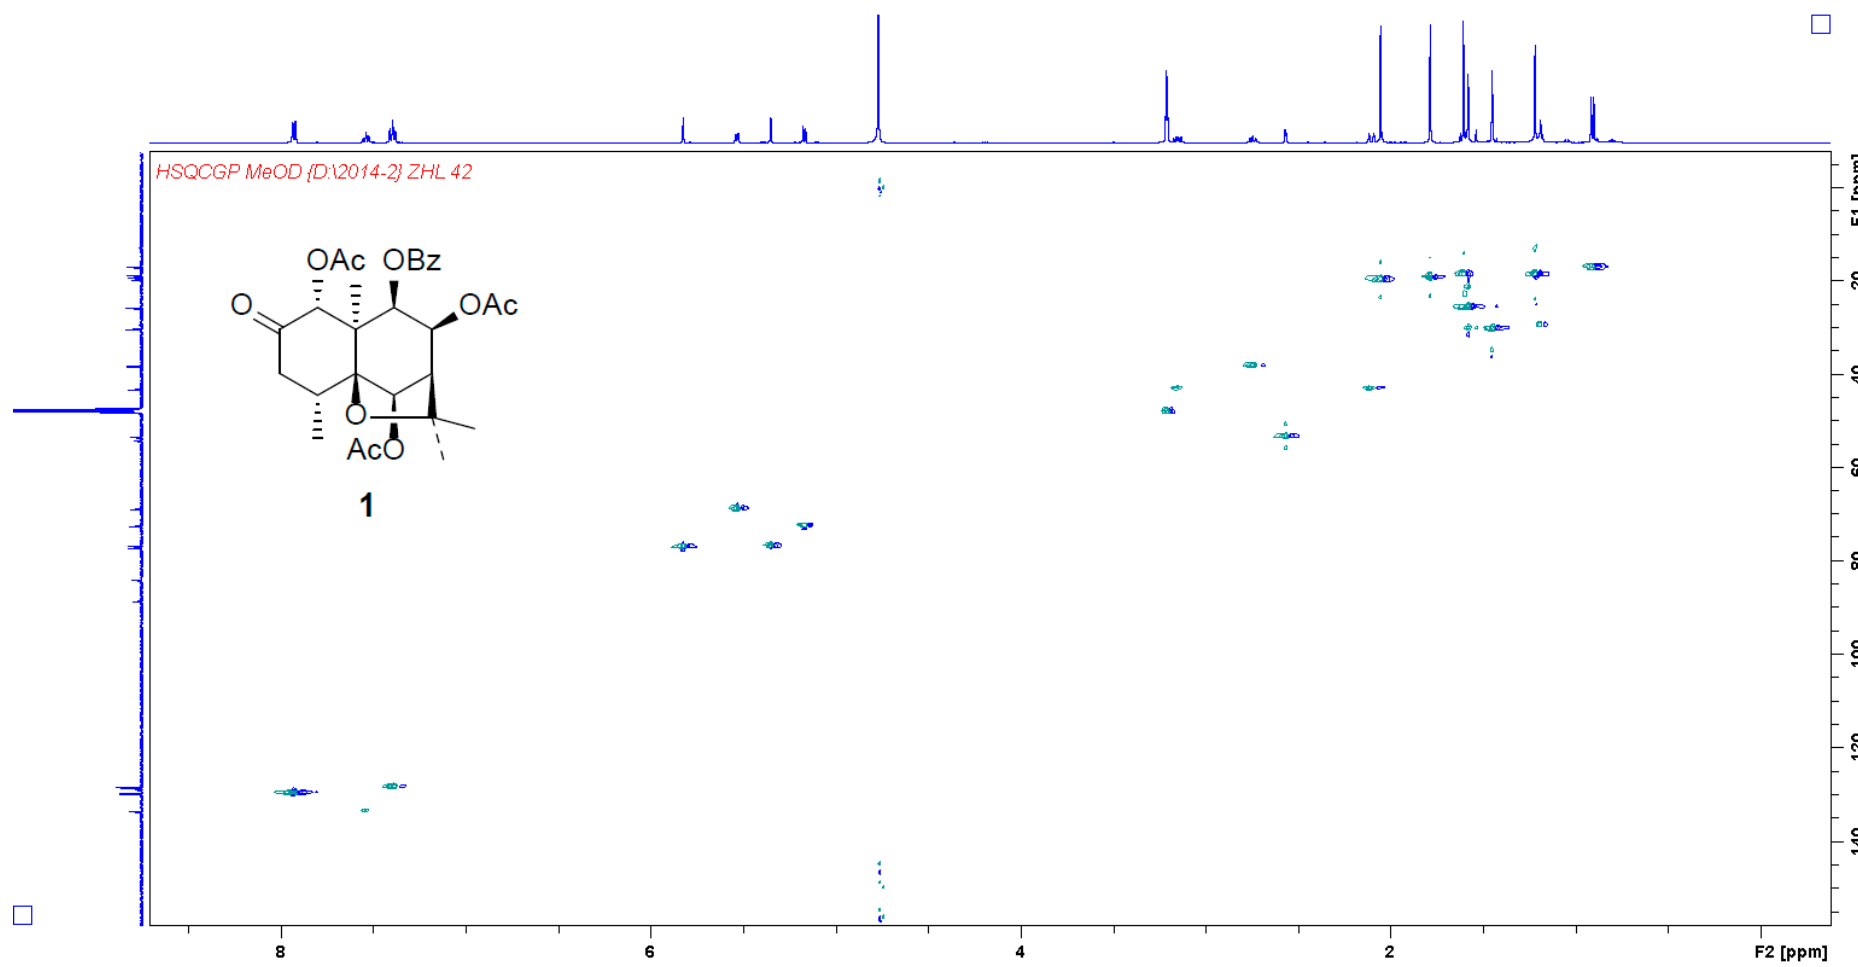

Figure S3. HSQC spectrum of **1**.

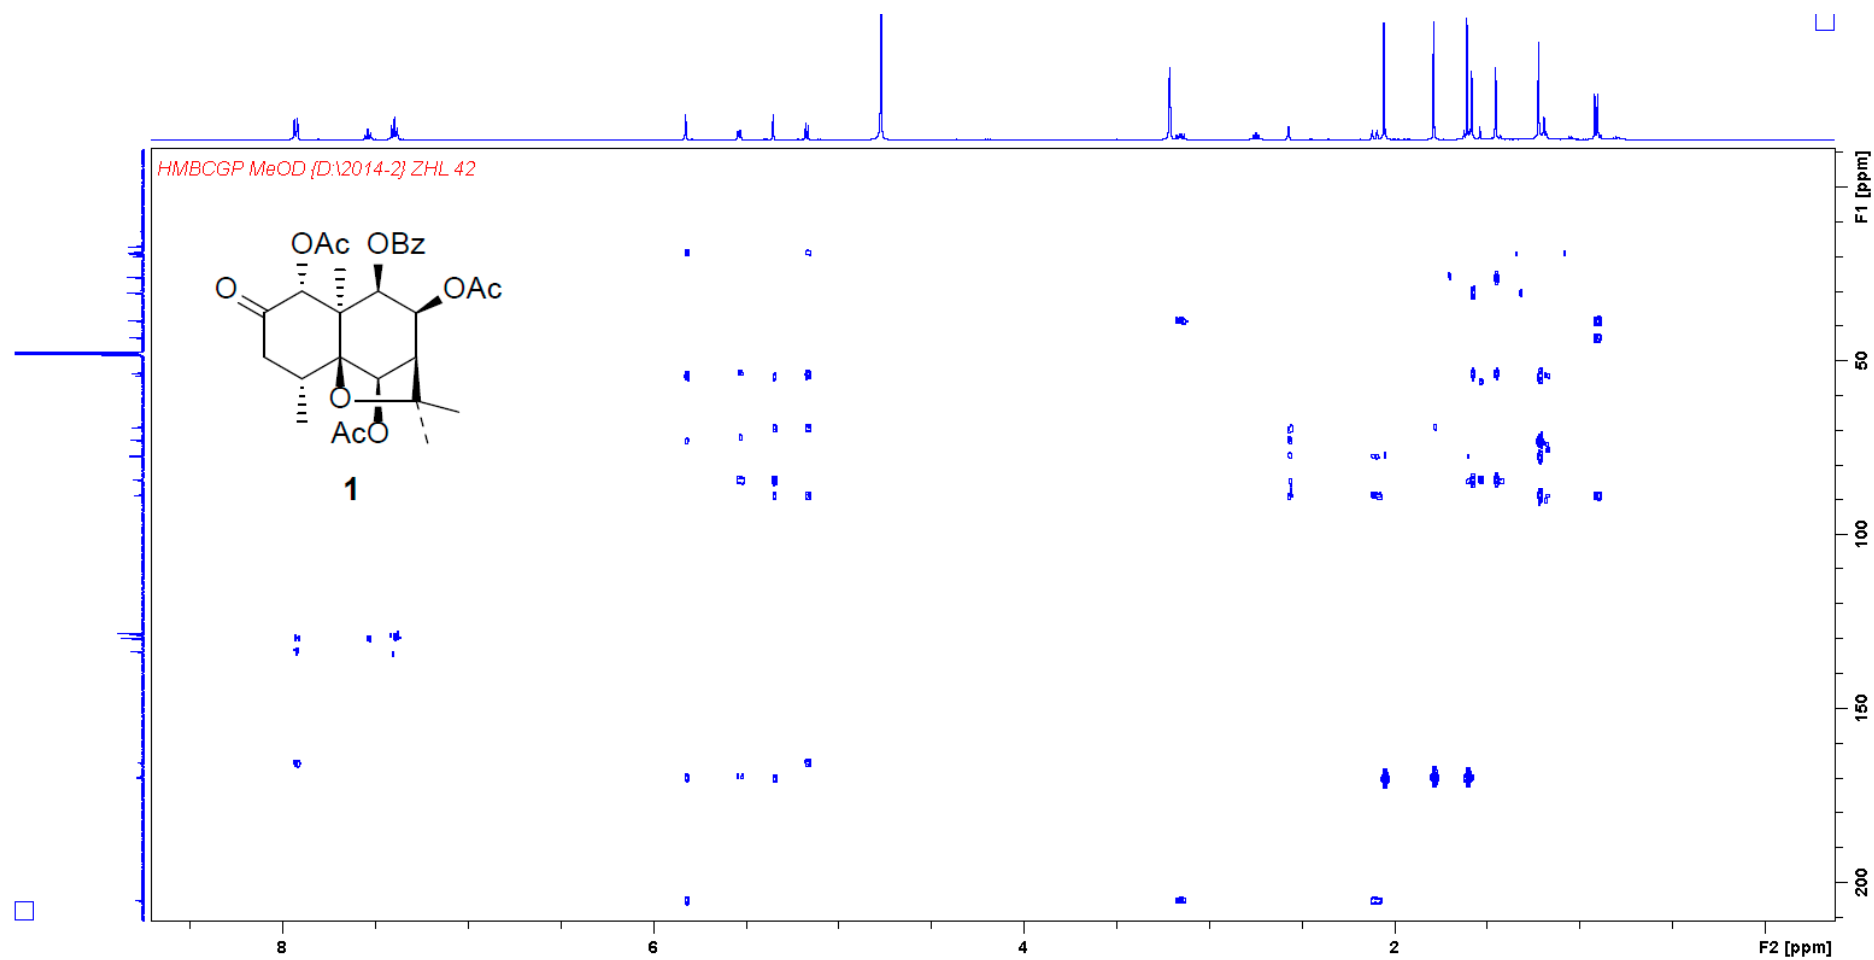

Figure S4. HMBC spectrum of 1.

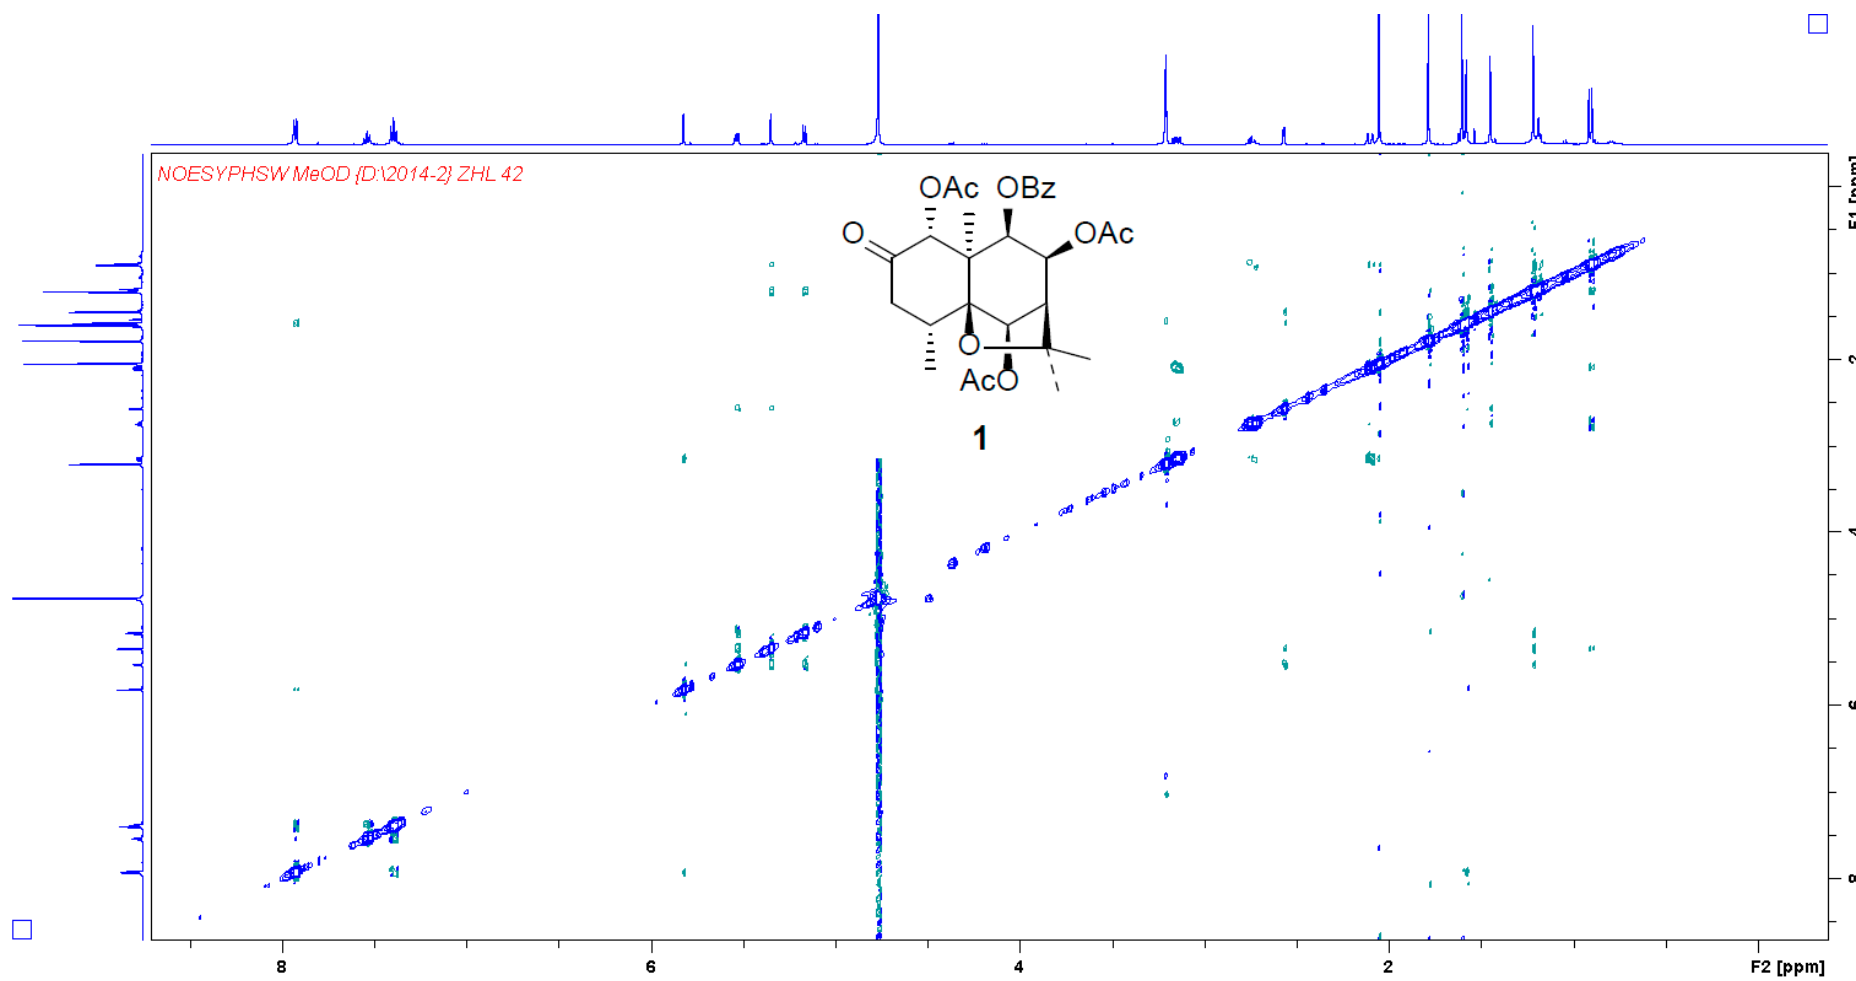

Figure S5. NOESY spectrum of **1**.

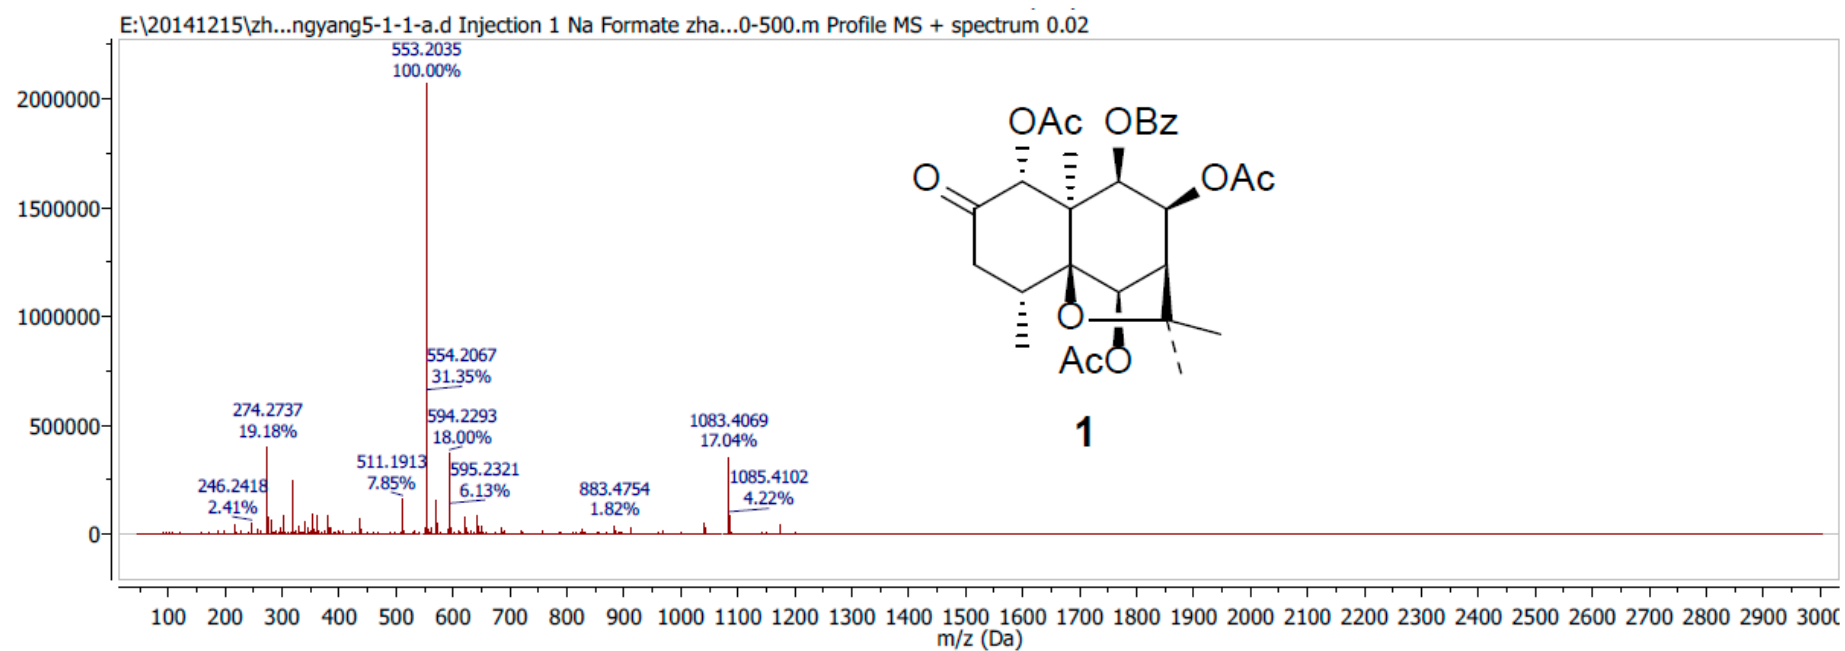

**Figure S6.** High-resolution mass spectrum of **1**.

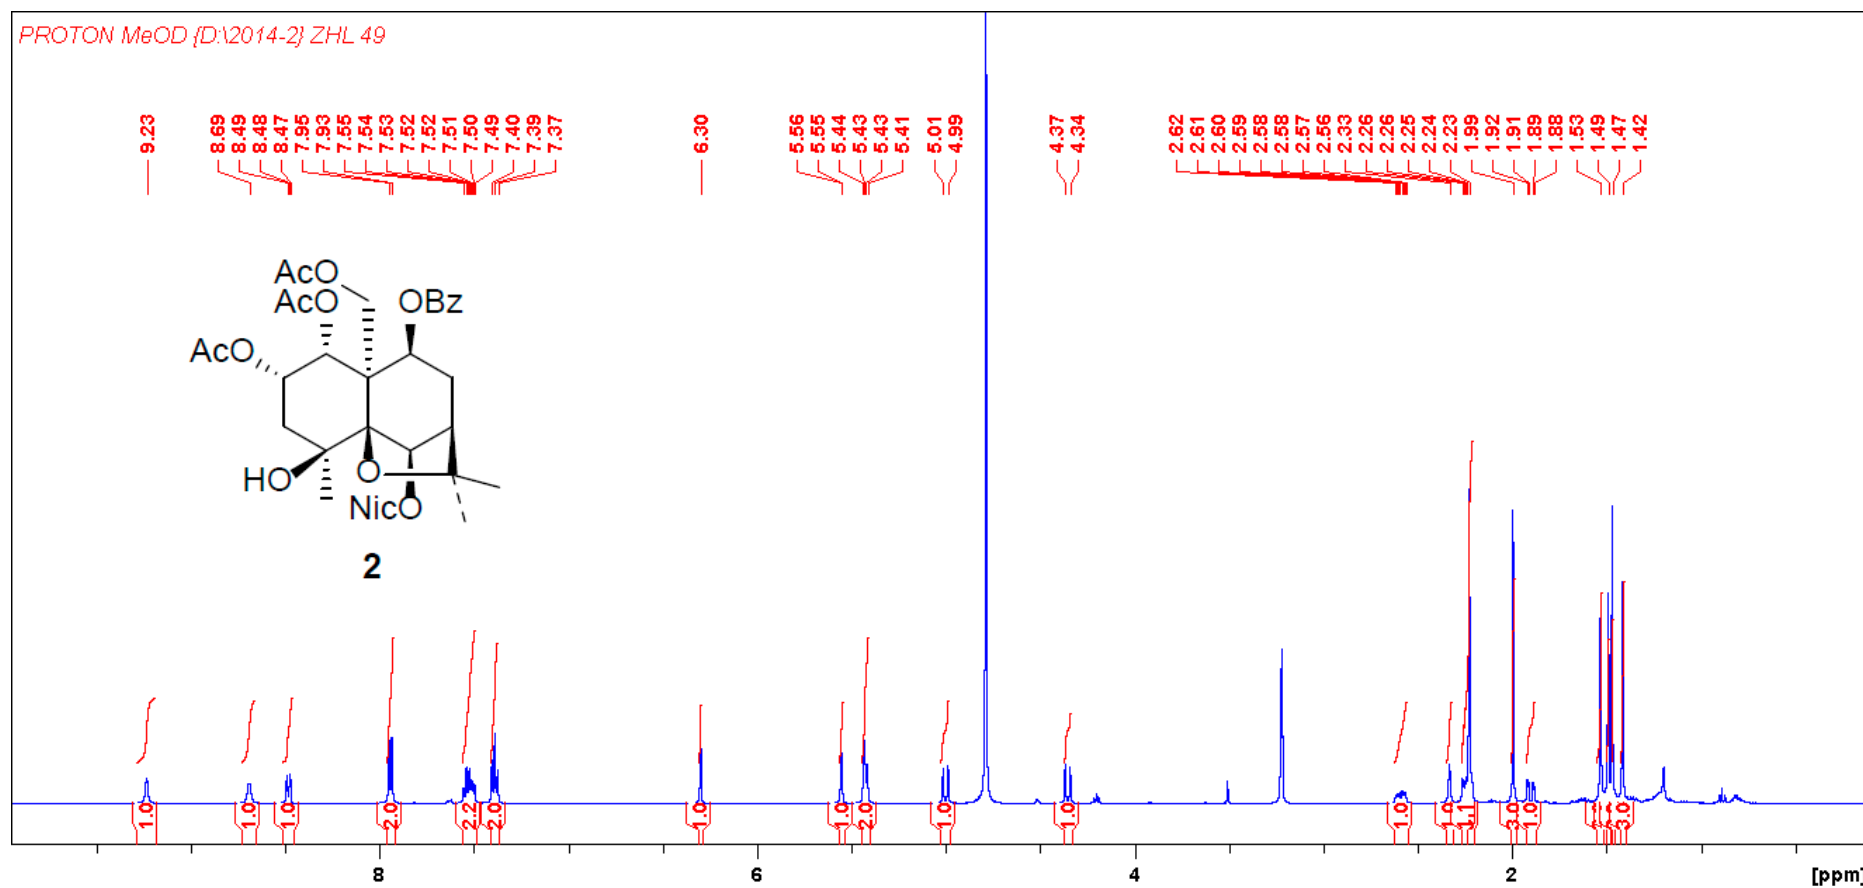

Figure S7.  $^1\text{H}$ -NMR ( $\text{CD}_3\text{OD}$ , 500 MHz) spectrum of **2**.

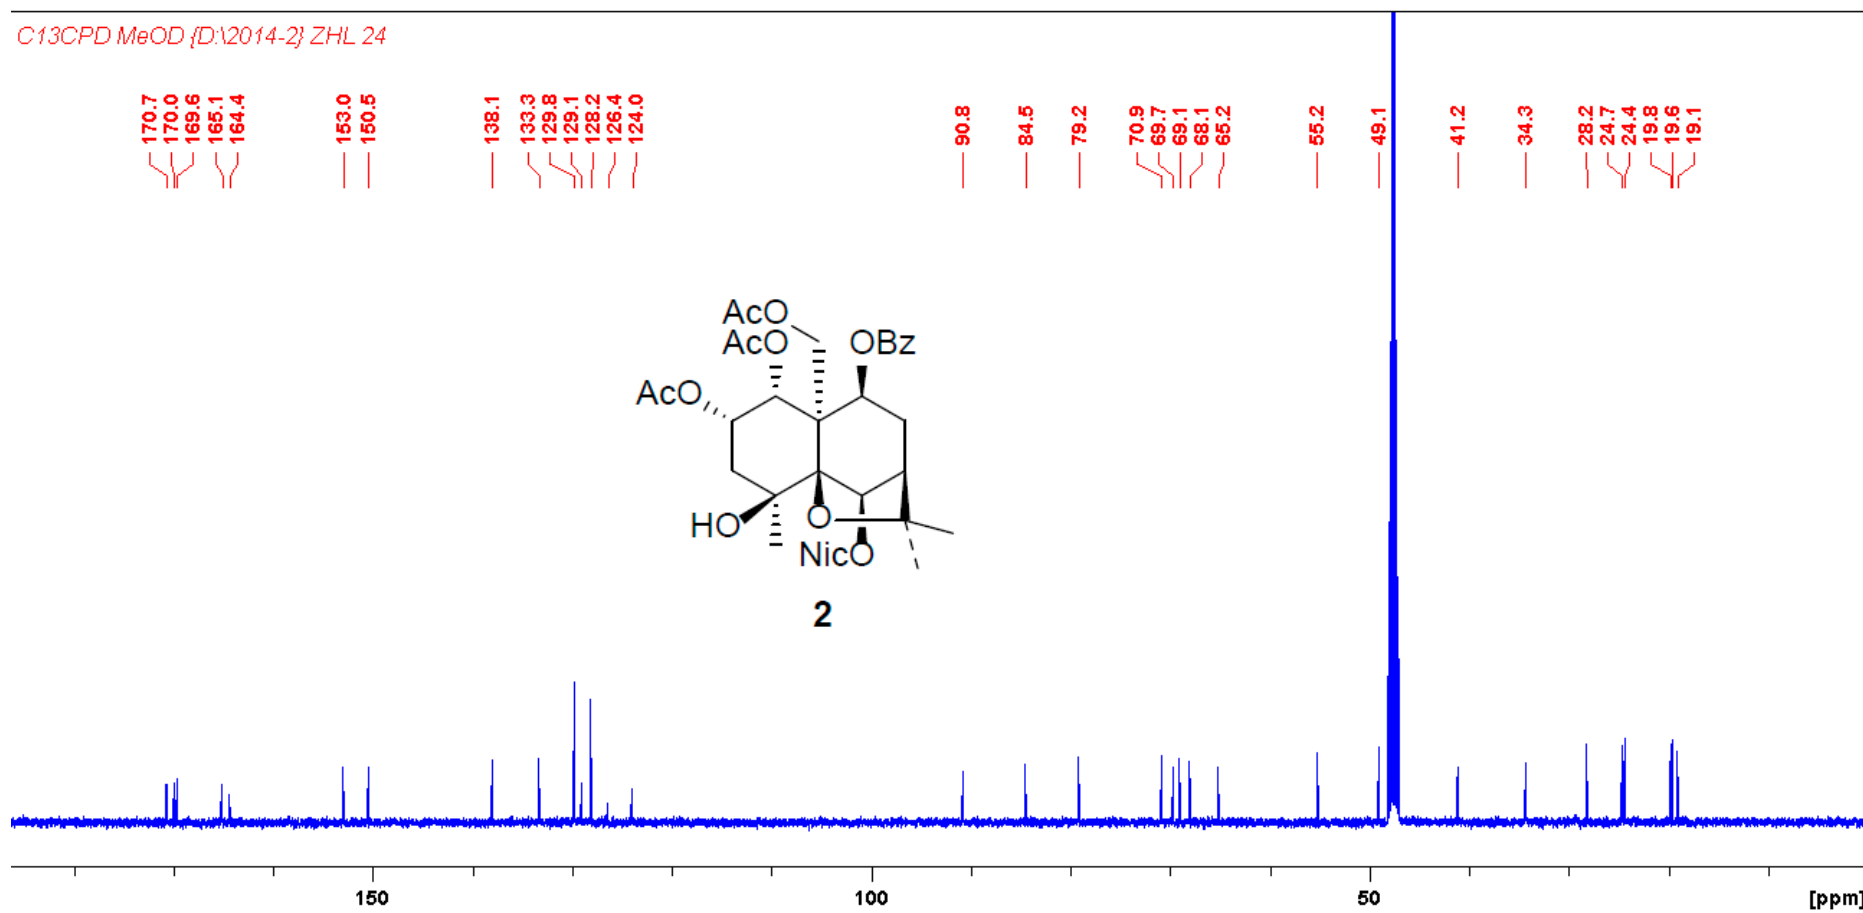

**Figure S8.**  $^{13}\text{C}$ -NMR ( $\text{CD}_3\text{OD}$ , 125 MHz) spectrum of **2**.



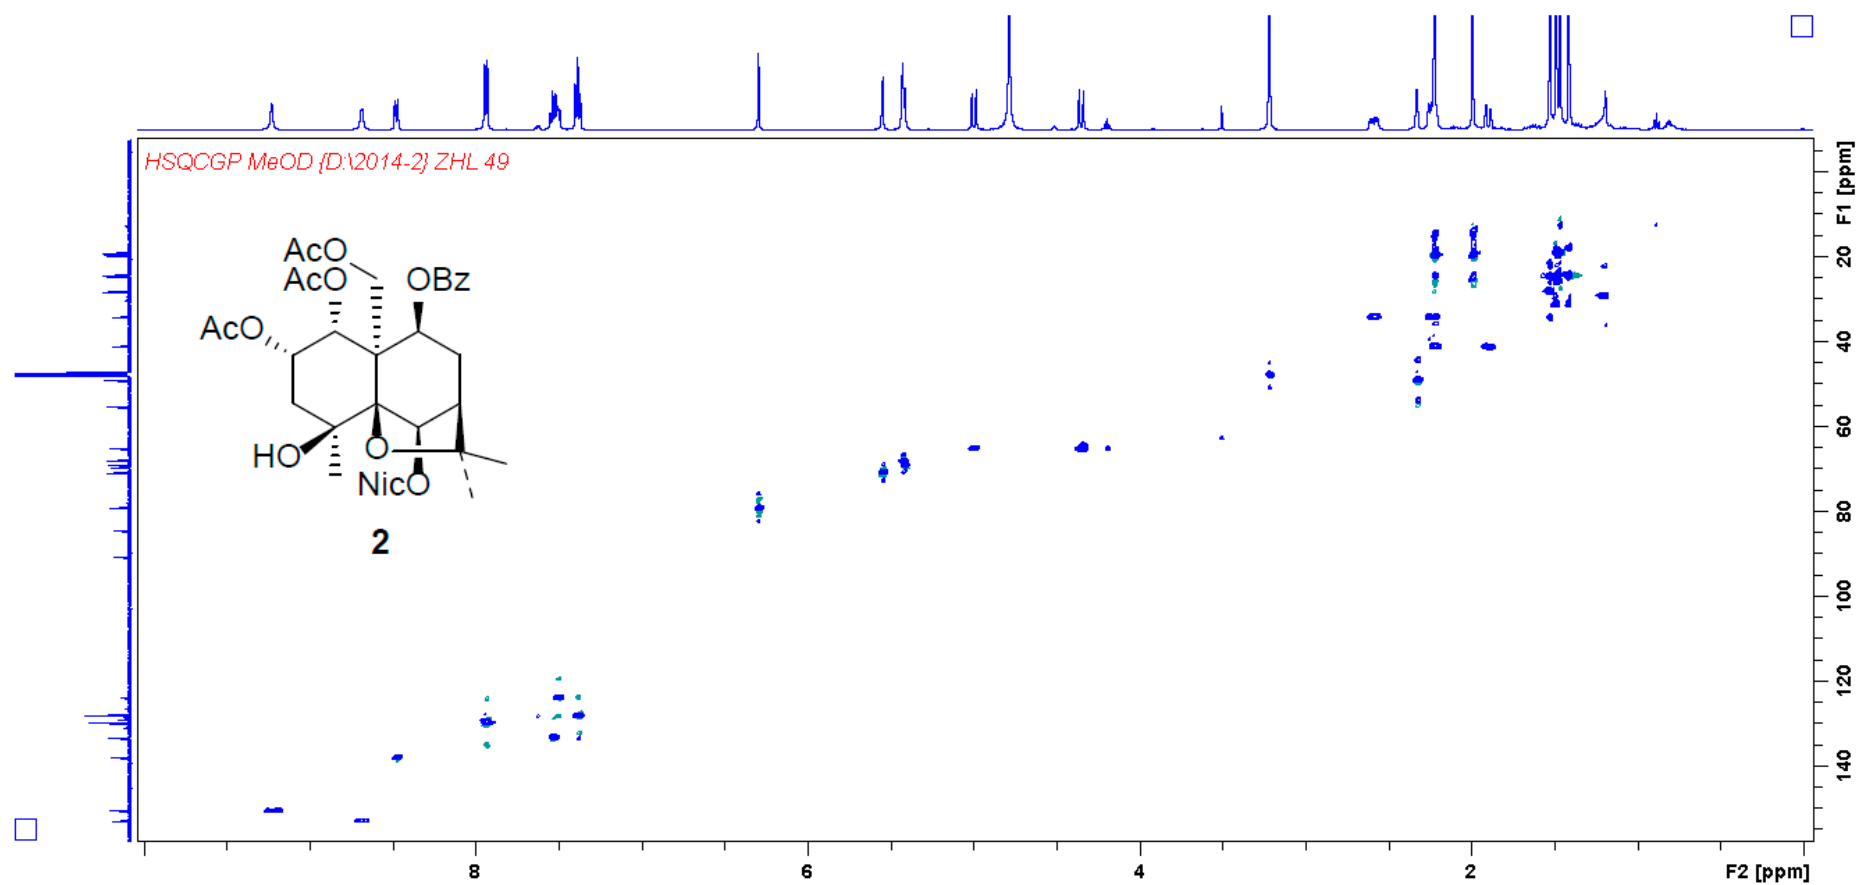

Figure S9. HSQC spectrum of **2**.

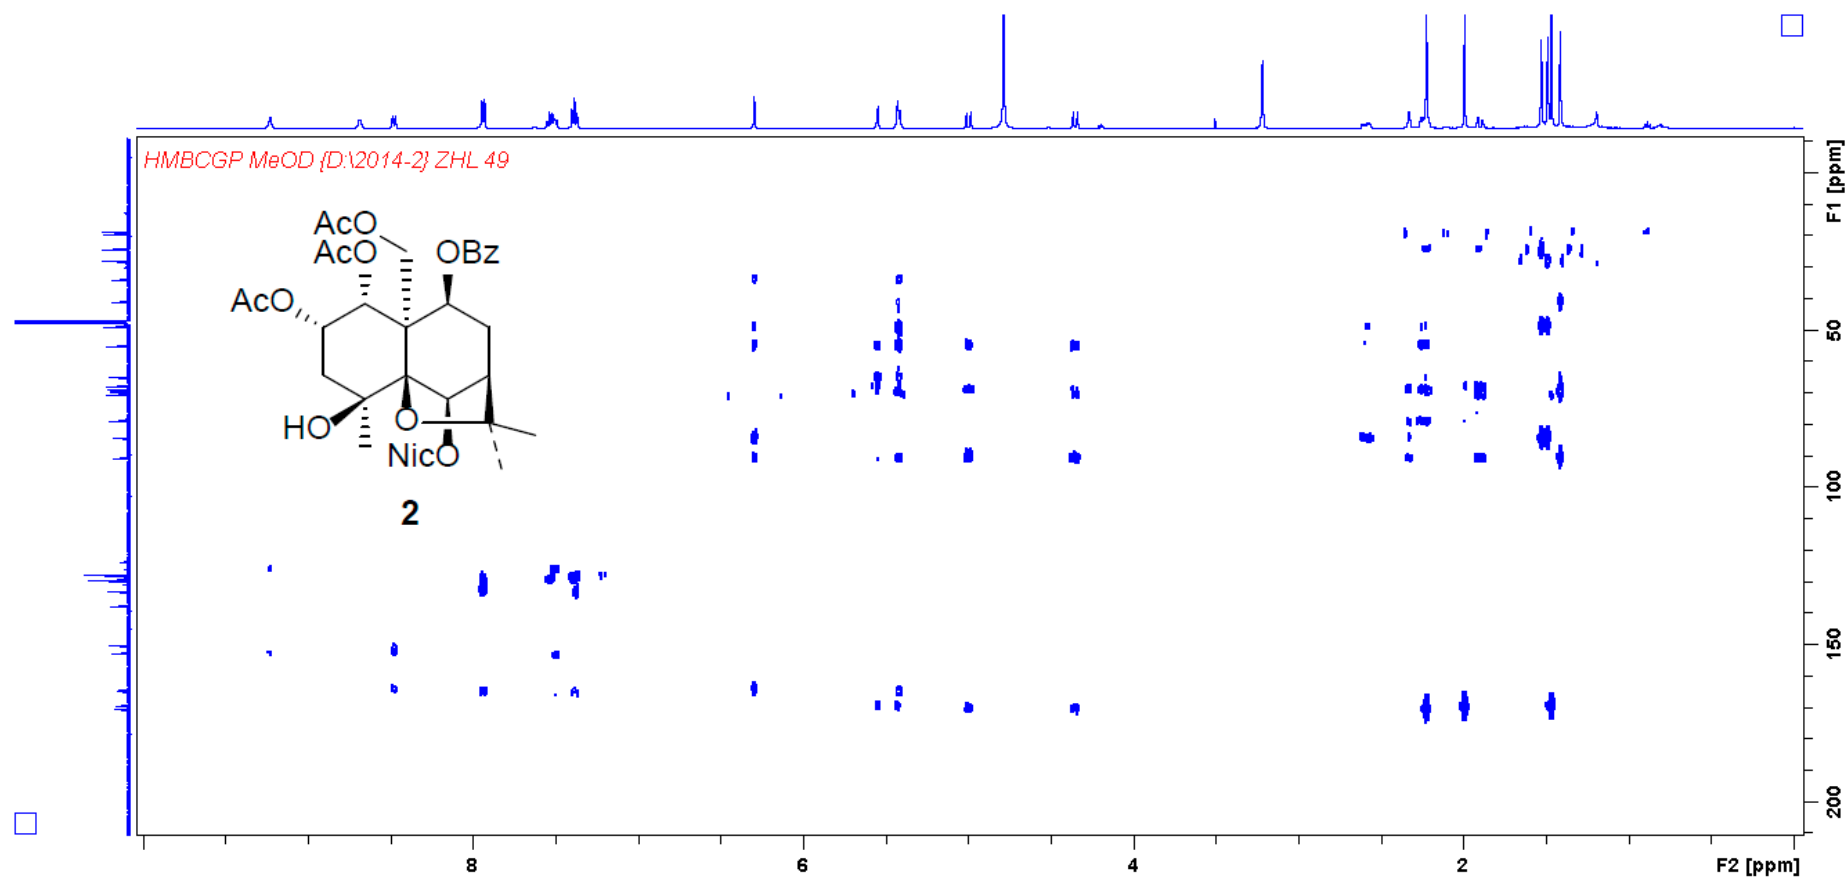

Figure S10. HMBC spectrum of **2**.

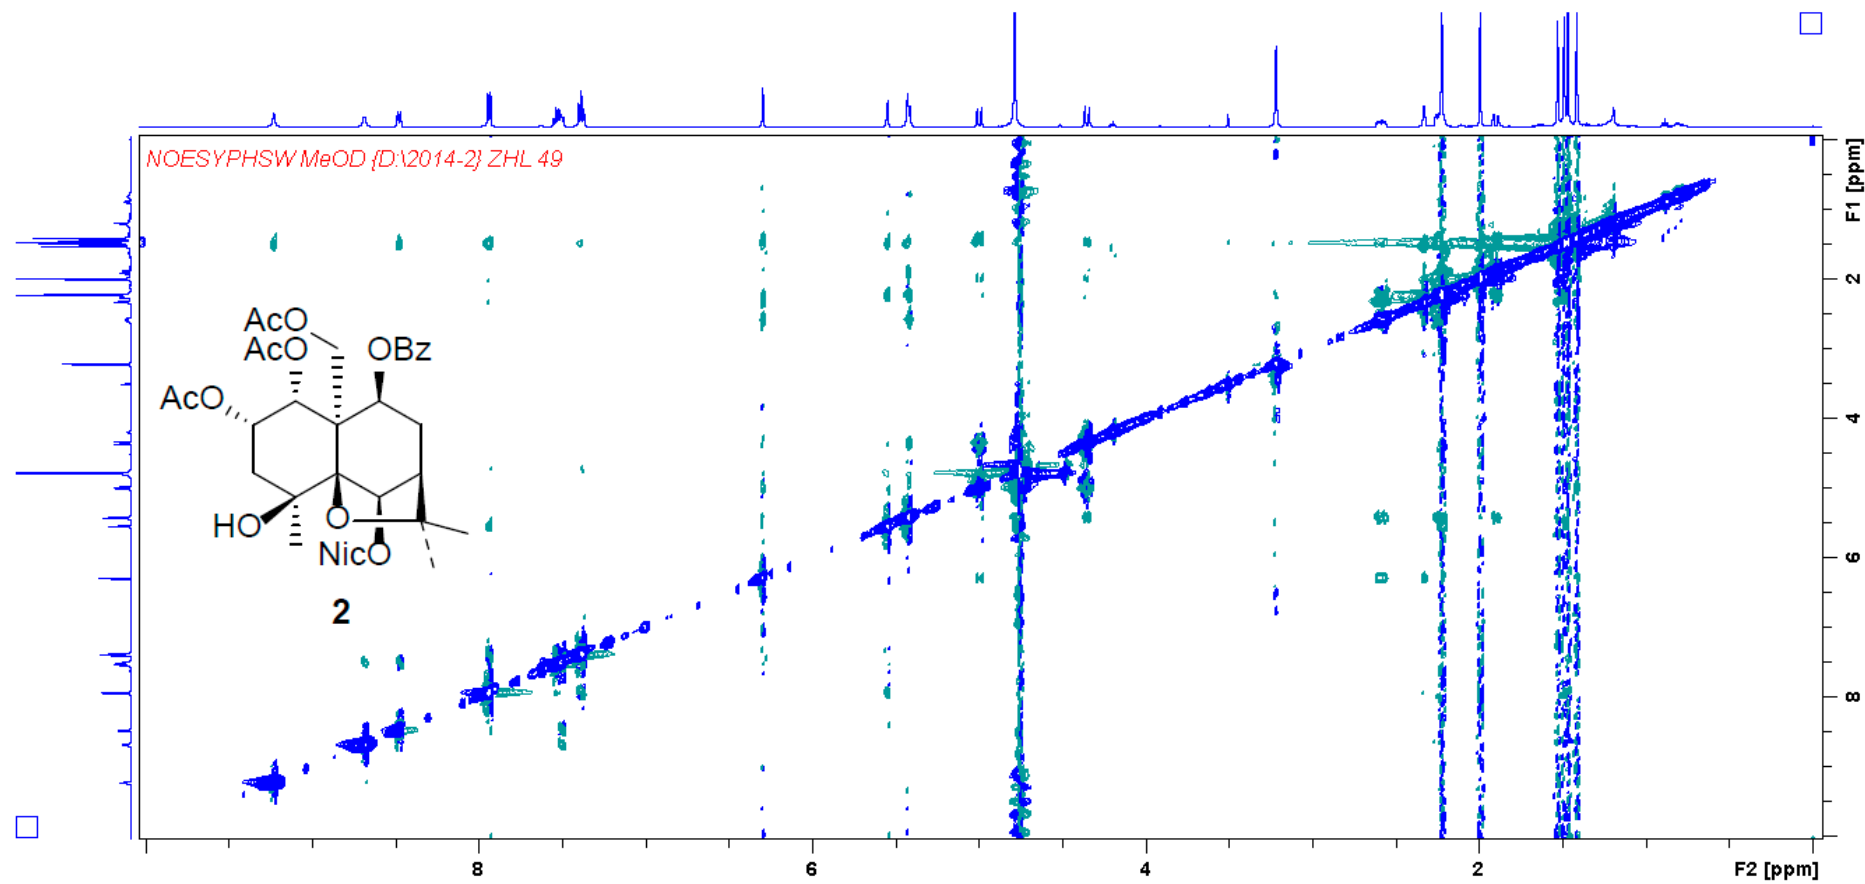

Figure S11. NOESY spectrum of **2**.

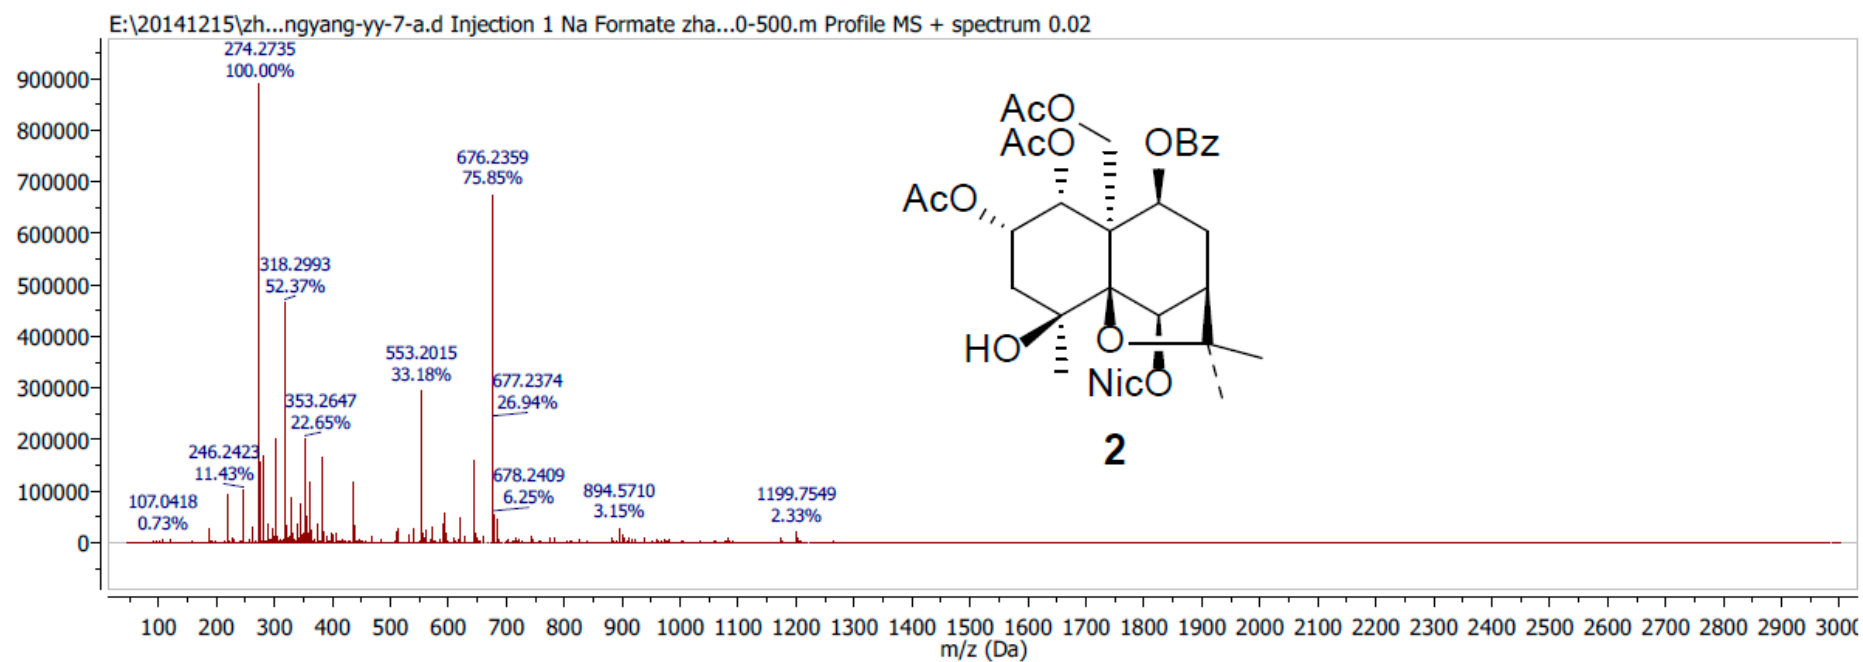

**Figure S12.** High-resolution mass spectrum of **2**.

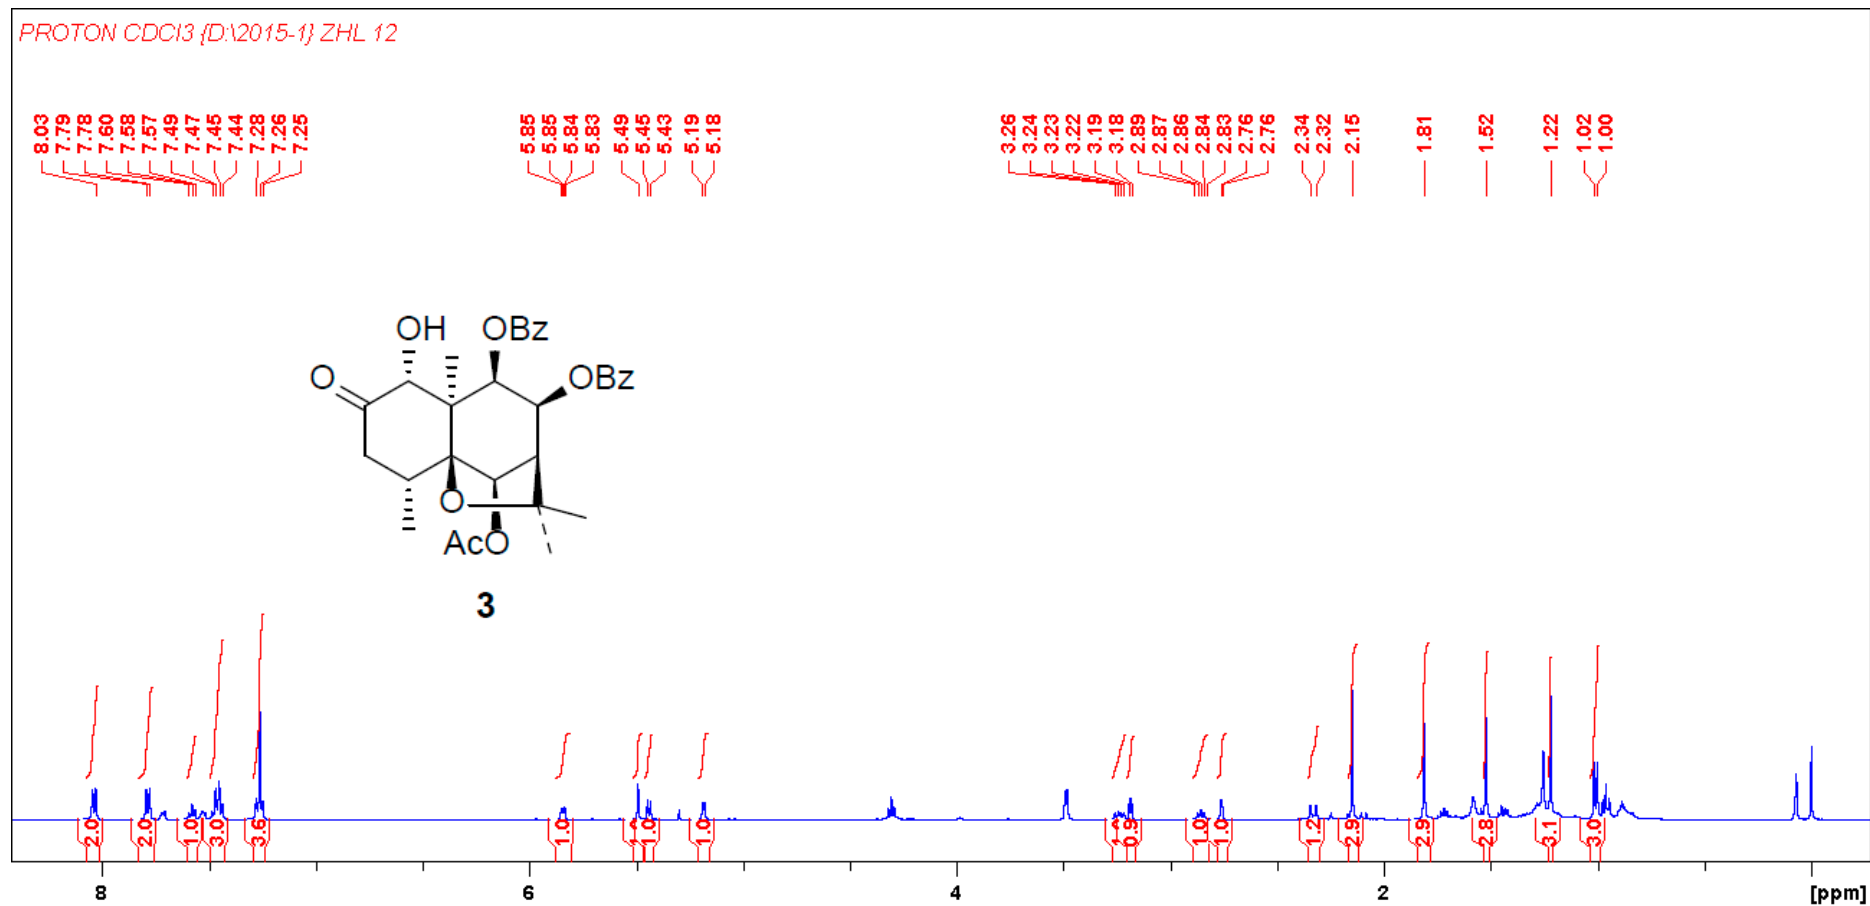

Figure S13. <sup>1</sup>H-NMR (CDCl<sub>3</sub>, 500 MHz) spectrum of **3**.

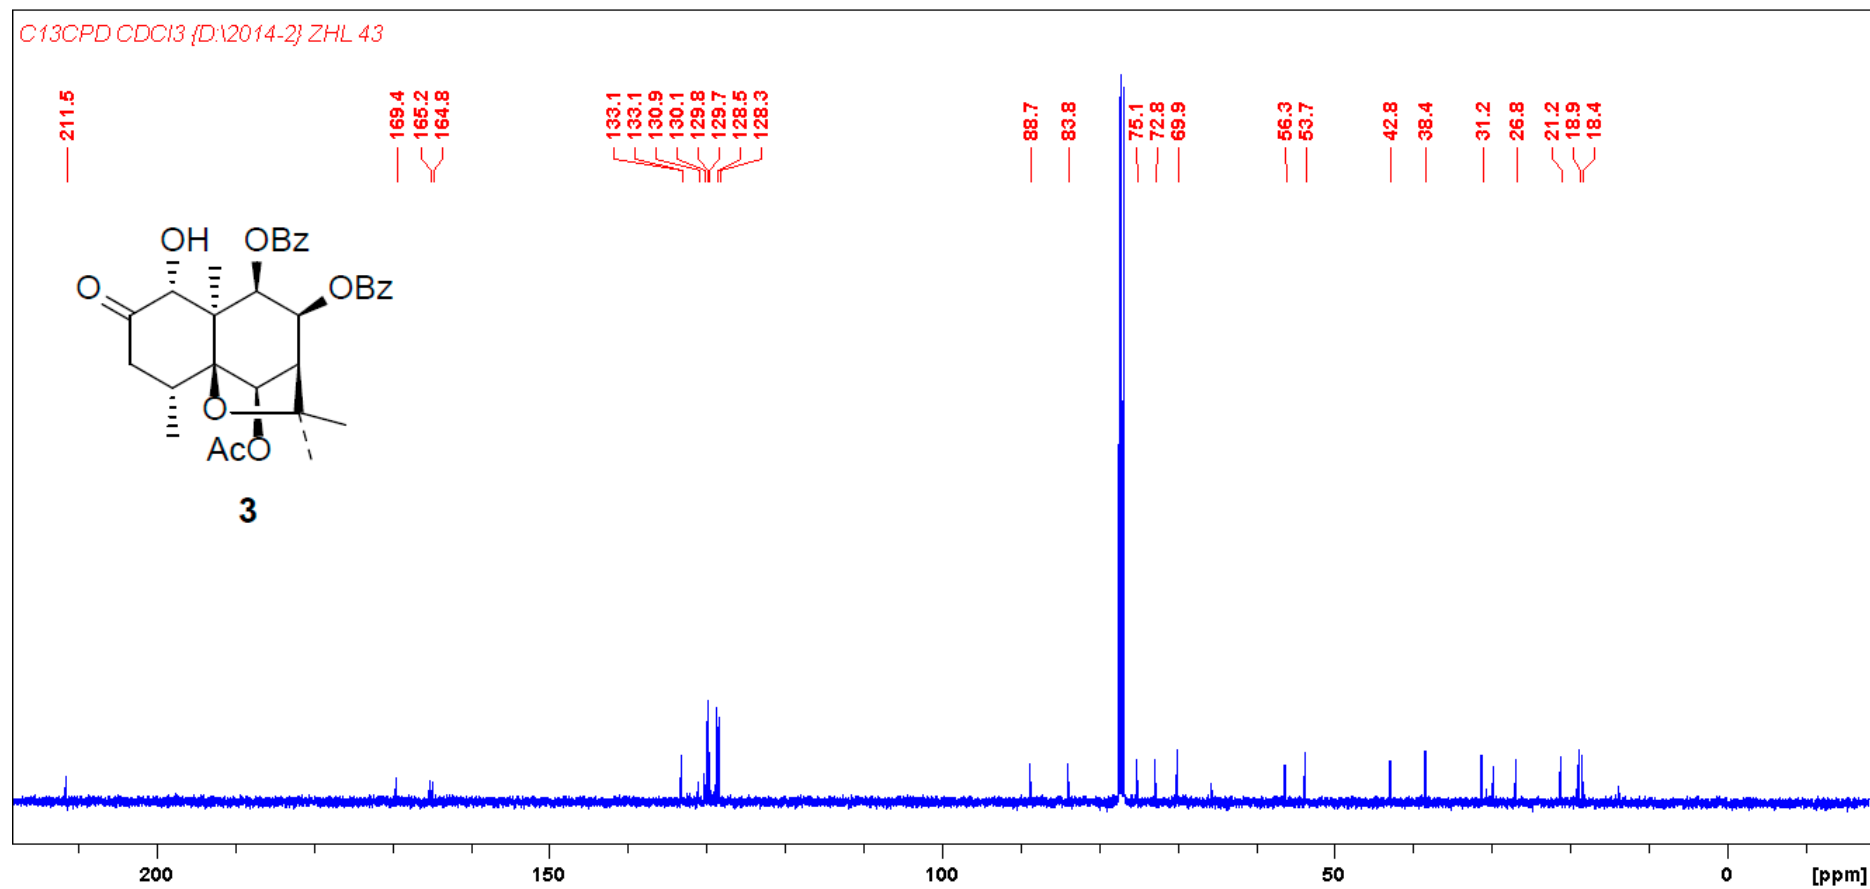

**Figure S14.**  $^{13}\text{C}$ -NMR ( $\text{CDCl}_3$ , 125 MHz) spectrum of **3**.

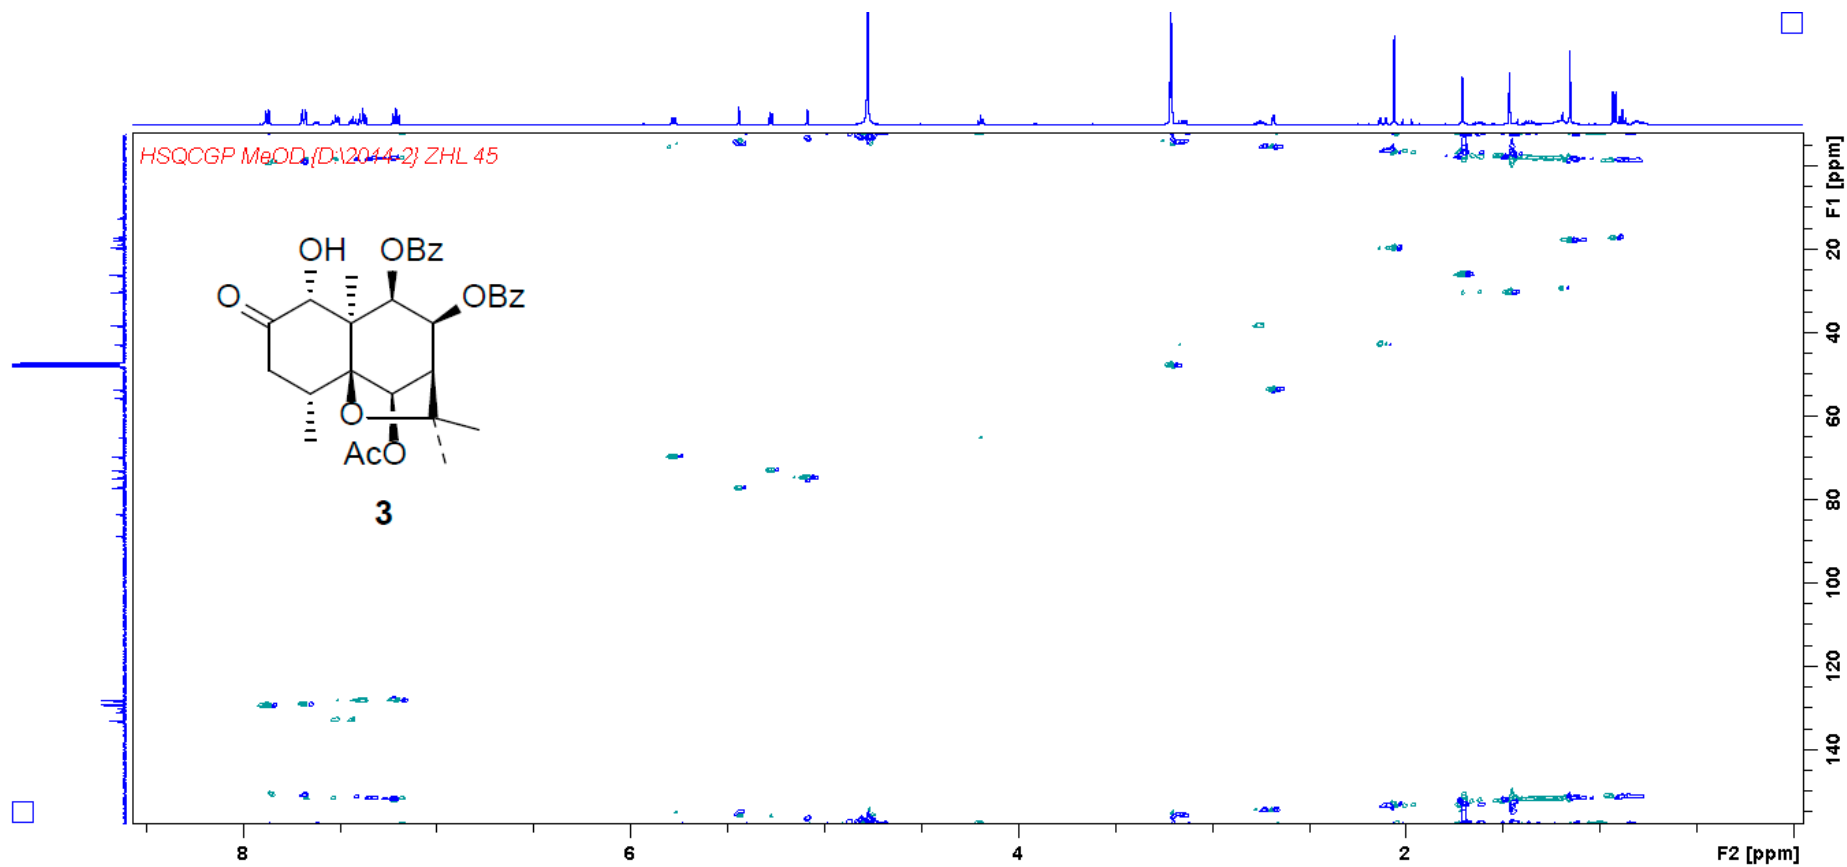

Figure S15. HSQC spectrum of **3**.

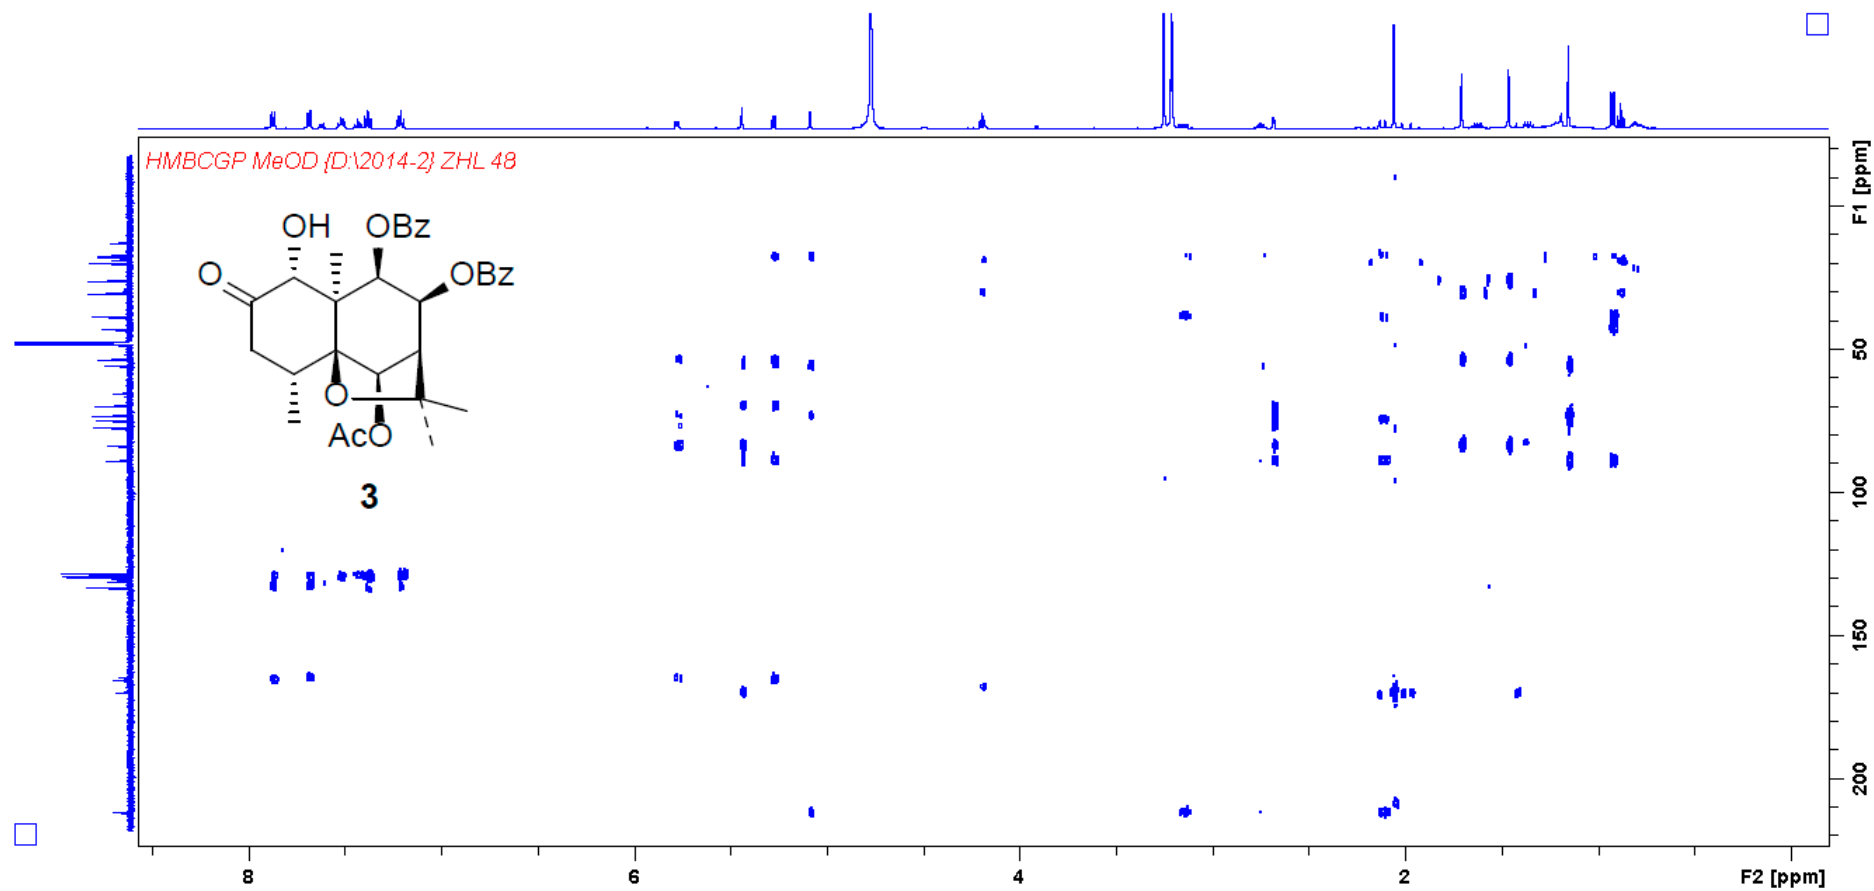

Figure S16. HMBC spectrum of **3**.



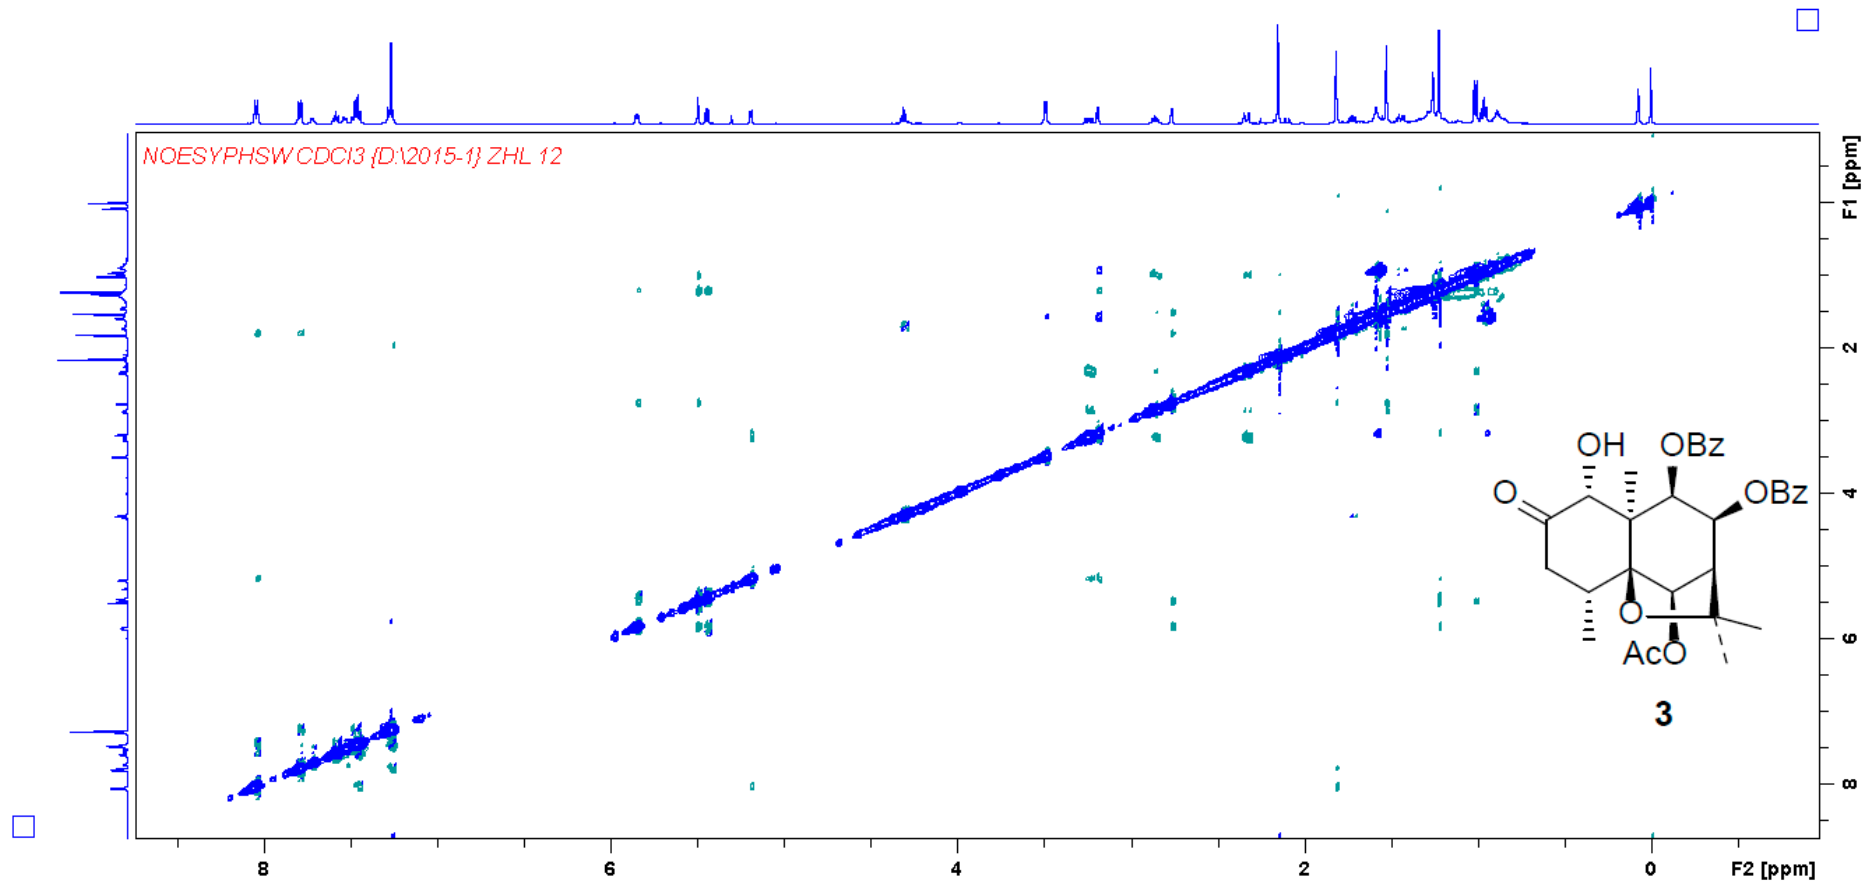

Figure S17. NOESY spectrum of **3**.

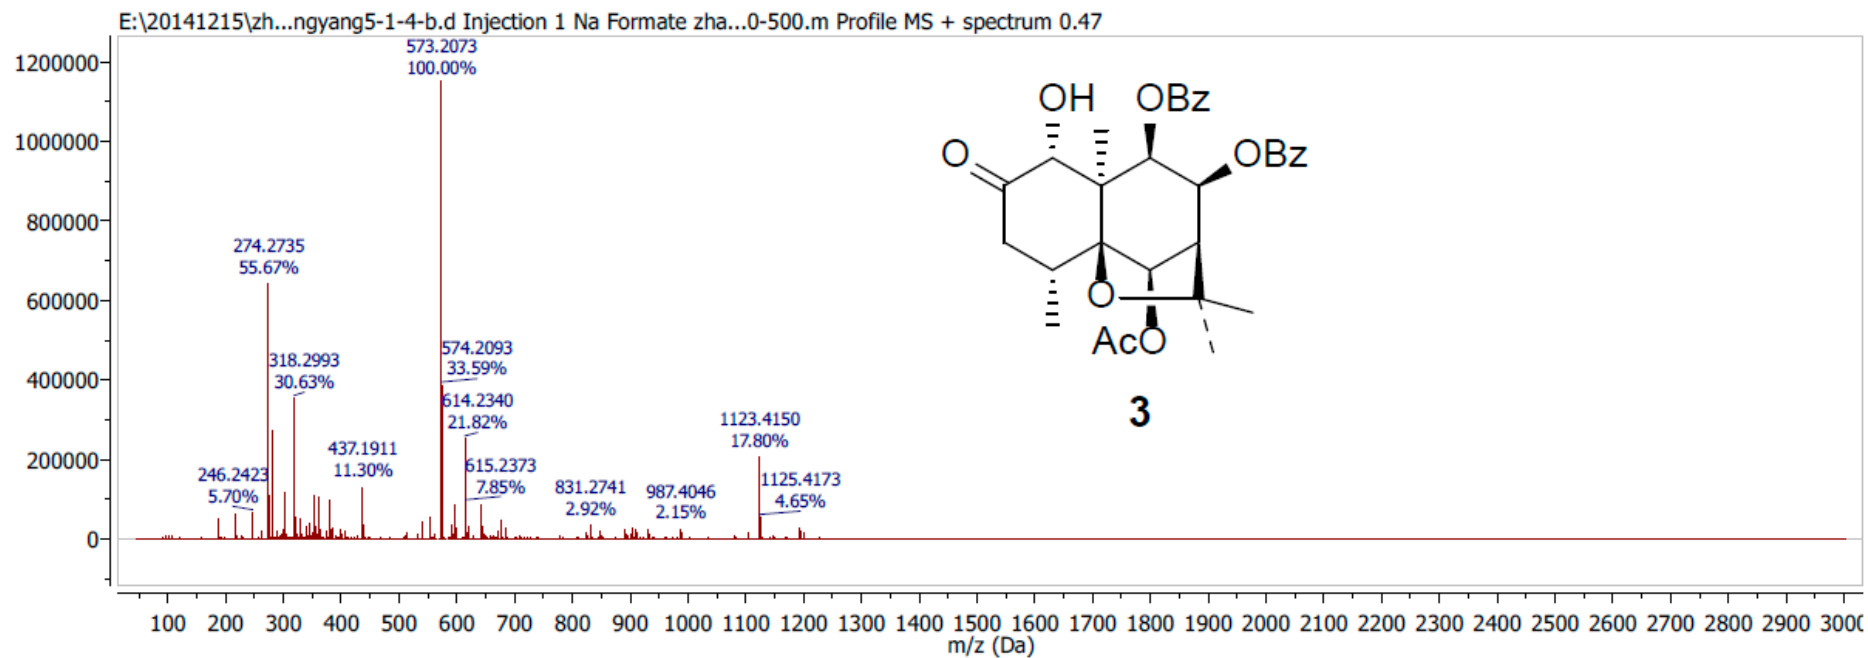

**Figure S18.** High-resolution mass spectrum of **3**.

**Figure S19.**  $^1\text{H}$ -NMR ( $\text{CDCl}_3$ , 500 MHz) spectrum of **4**.

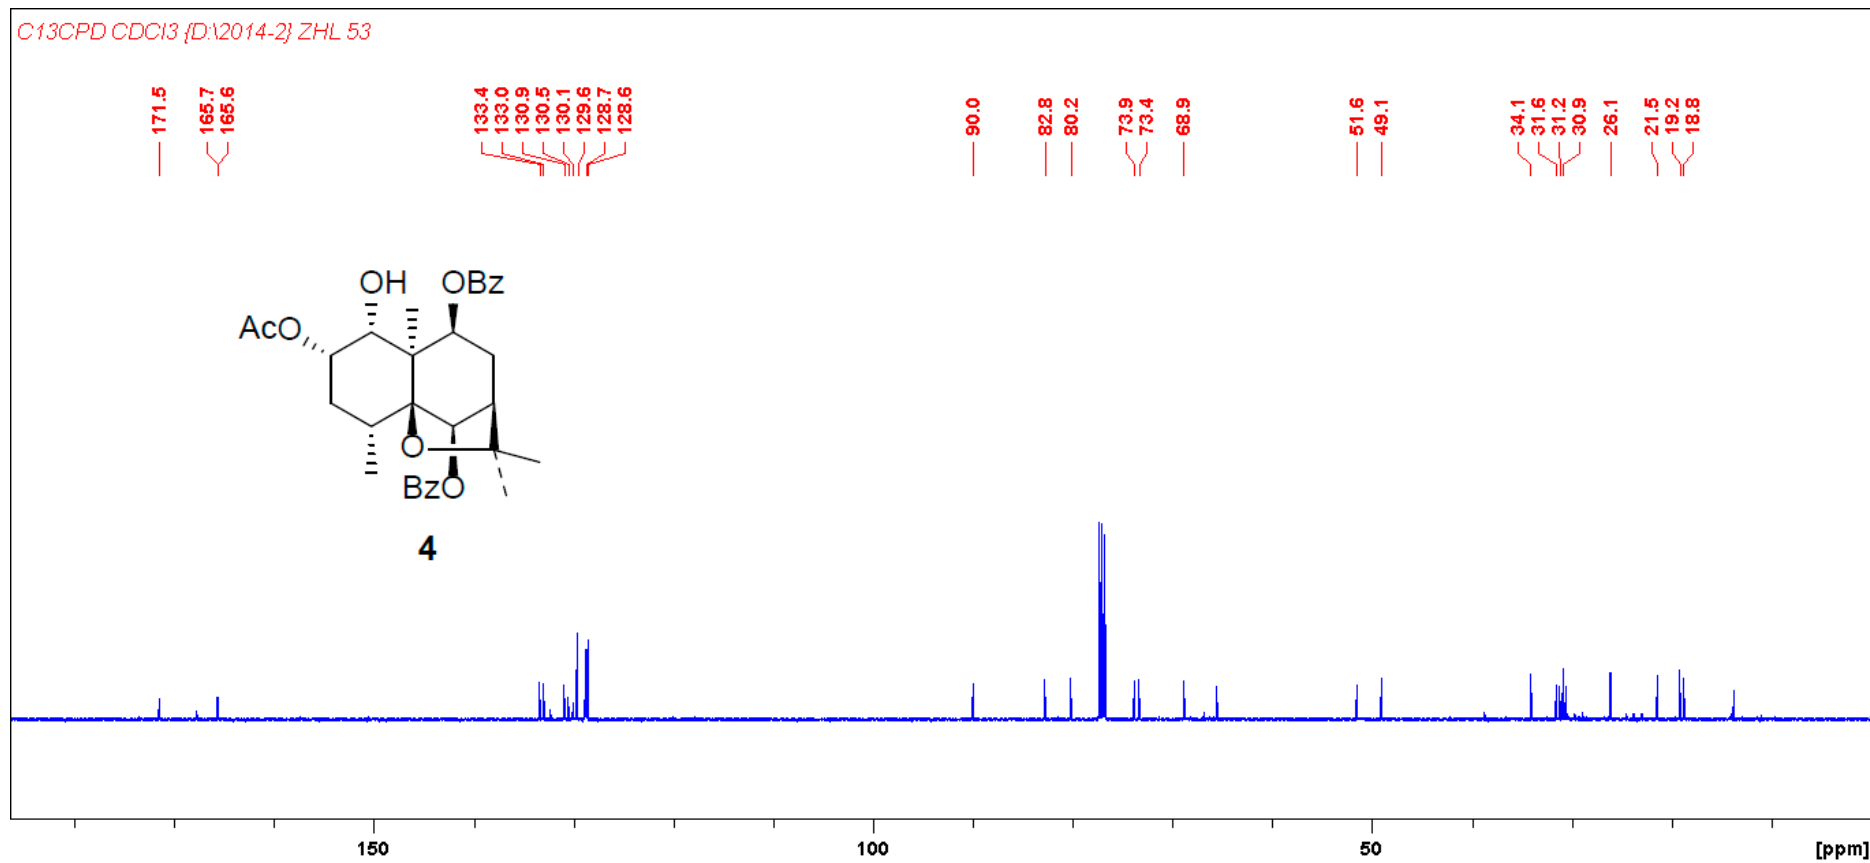

**Figure S20.**  $^{13}\text{C}$ -NMR ( $\text{CDCl}_3$ , 125 MHz) spectrum of **4**.

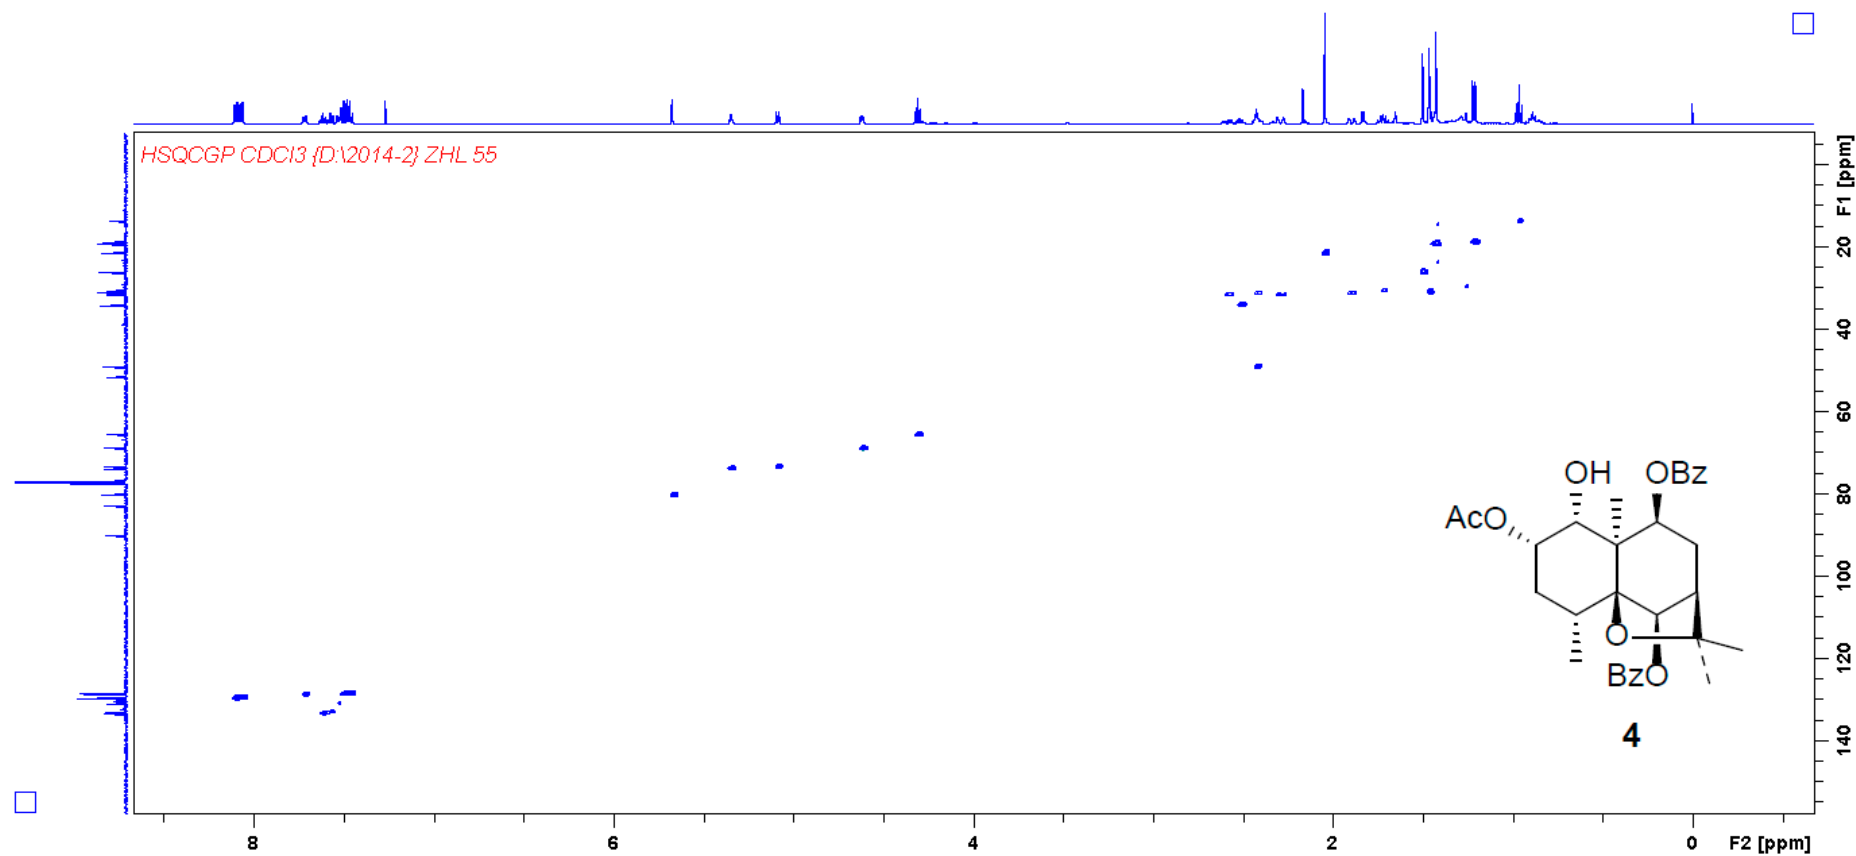

Figure S21. HSQC spectrum of **4**.

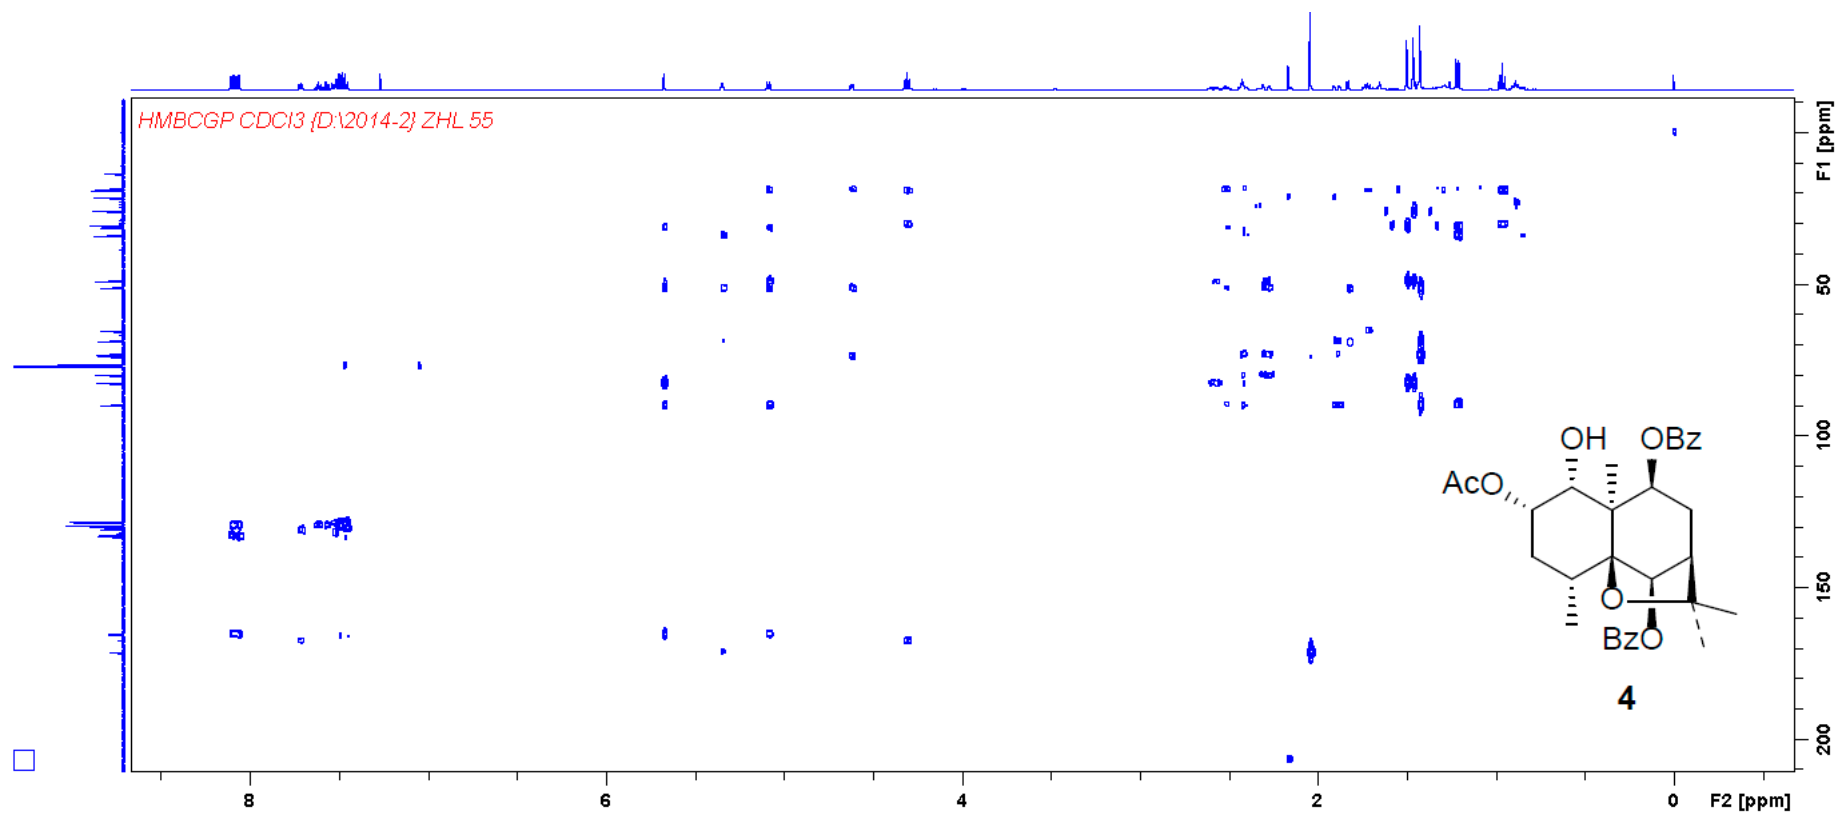

Figure S22. HMBC spectrum of **4**.

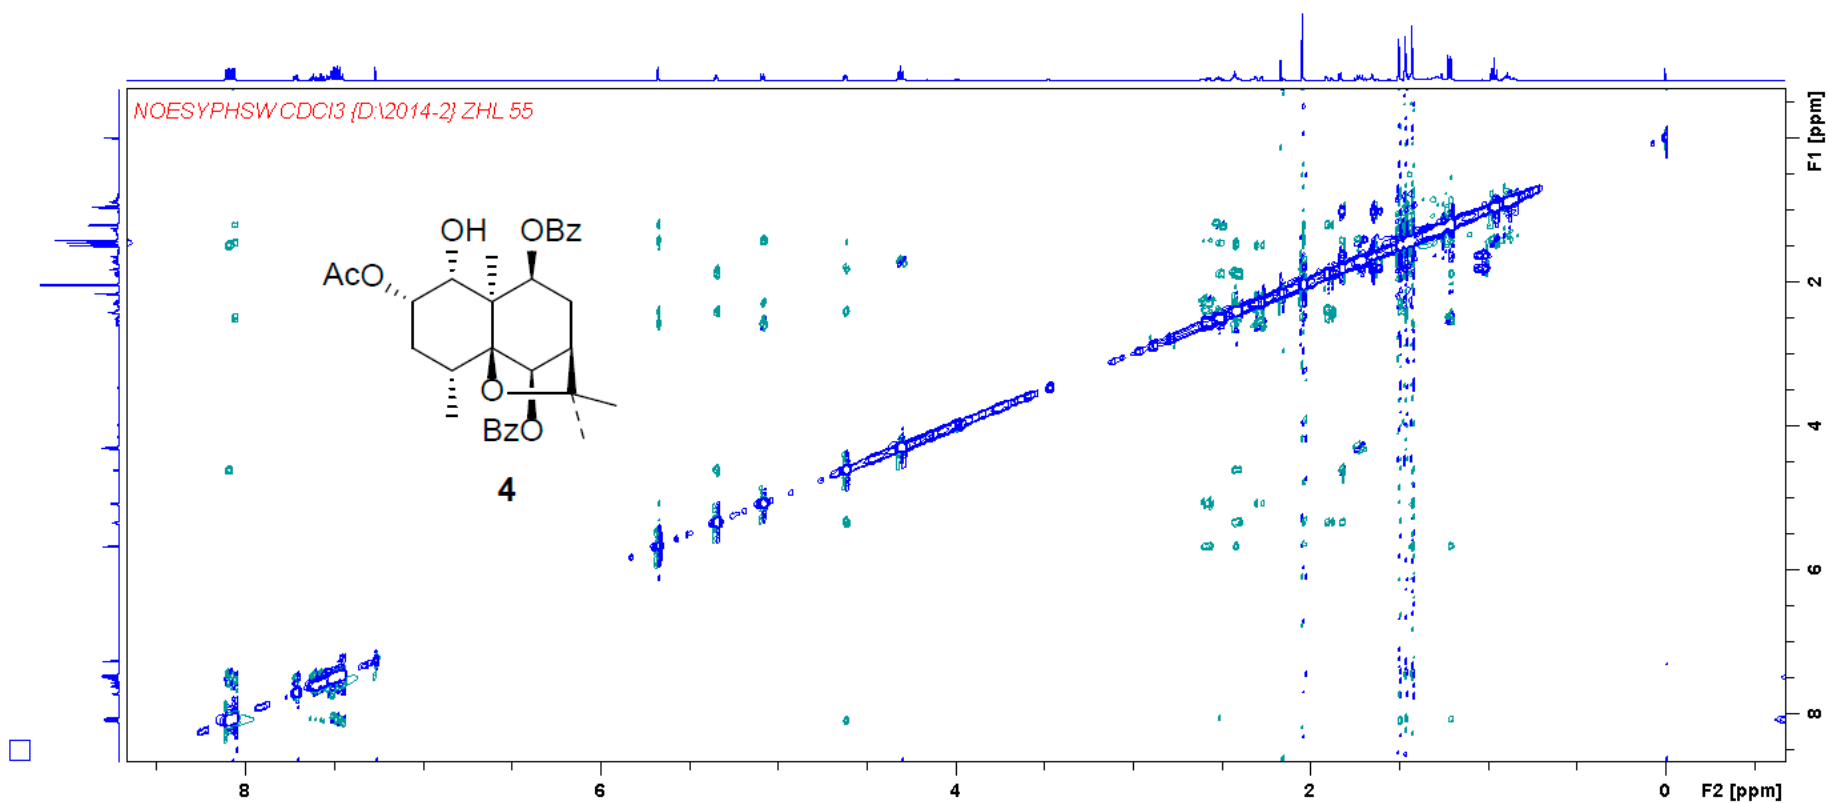

Figure S23. NOESY spectrum of **4**.

[ZL]-51861 #5-9 RT: 0.02-0.03 AV: 5 NL: 2.31E5  
T: ITMS + c ESI sid=35.00 Full ms [50.00-2000.00]

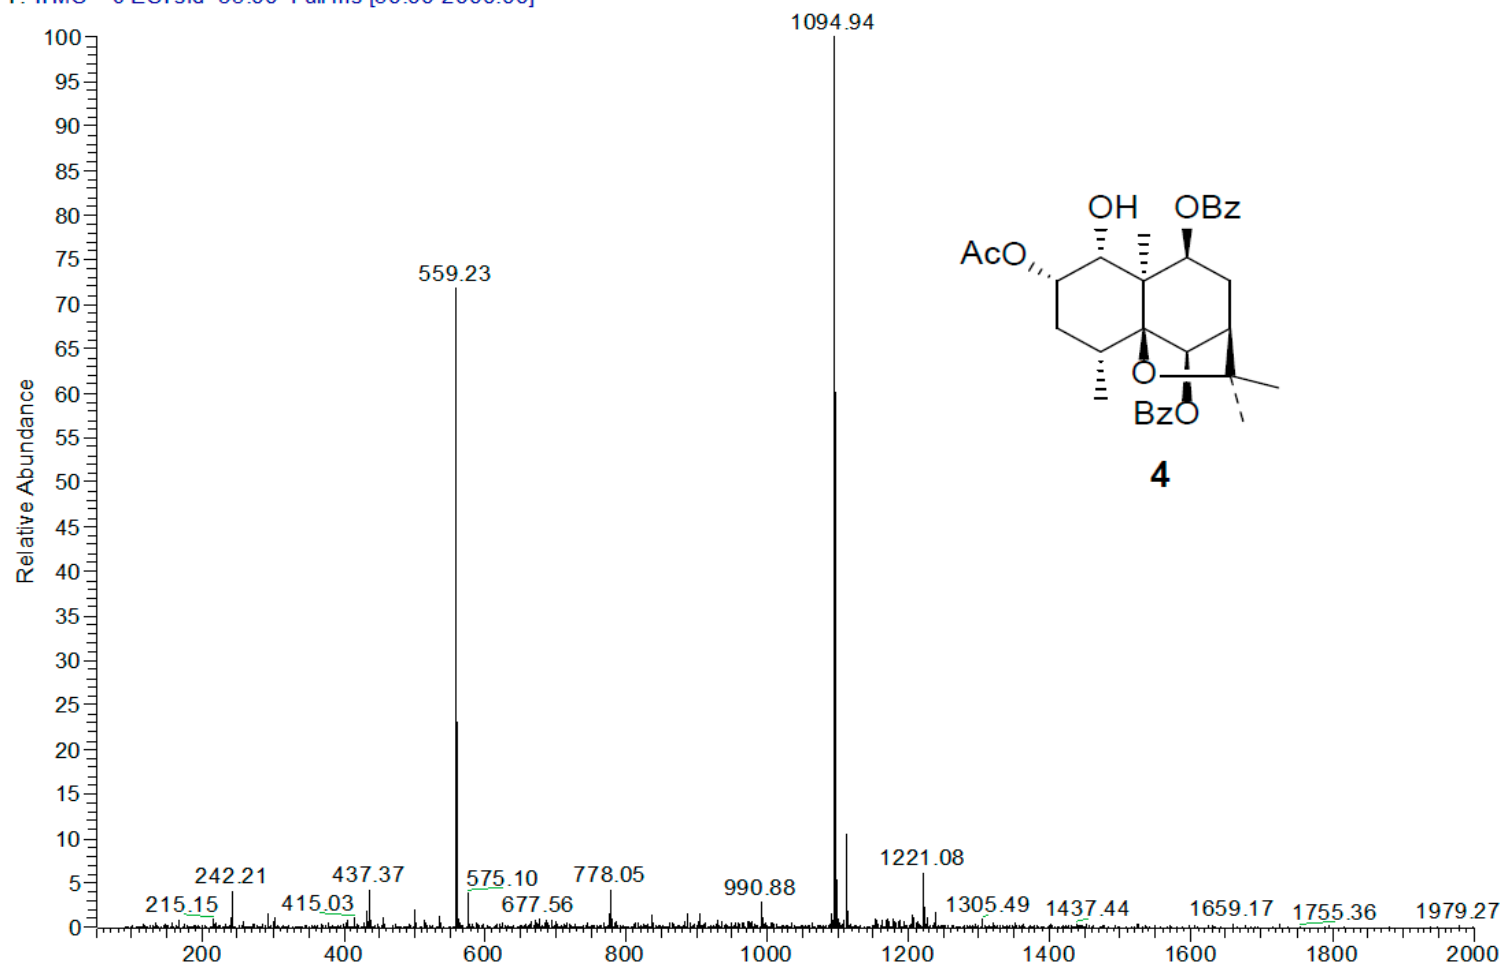

Figure S24. ESI-MS spectrum of **4**.
